# Supplementary material
Source: publisher figshare collection journal article supplement (https://acs.figshare.com/ndownloader/files/14954459)
Supplement: Supplementary file 1 [file 14954459]

## Supplementary Information (SI)

### Penttiptycenyl Substituents in Insertion Polymerization with $\alpha$ -Diimine Nickel and Palladium Species

Yudan Liao,<sup>a,b</sup> Yixin Zhang,<sup>a</sup> Lei Cui,<sup>a</sup> Hongliang Mu<sup>a</sup> and Zhongbao Jian<sup>a,\*</sup>

<sup>a</sup> State Key Laboratory of Polymer Physics and Chemistry, Changchun Institute of Applied Chemistry, Chinese Academy of Sciences, Renmin Street 5625, Changchun 130022, China

<sup>b</sup> University of Chinese Academy of Sciences, Beijing 100049, China

#### Contents

|                                               |     |
|-----------------------------------------------|-----|
| 1. Figures and Tables                         | S2  |
| 2. General Considerations                     | S5  |
| 3. Preparation of ligands and catalysts       | S5  |
| 4. General procedures for the polymerizations | S7  |
| 5. NMR figures of ligands and catalysts       | S9  |
| 6. NMR figures of (co)polymers                | S11 |
| 7. GPC traces and DSC data of (co)polymers    | S23 |
| 8. MALDI-TOF-MS of the complexes              | S39 |
| 9. References                                 | S41 |

## Figures and Tables

**Table S1.** Result for ethylene polymerizations at different temperatures and times<sup>a</sup>

| Entry | Cat.            | <i>T</i> /°C | Time/min | Yield/g | Act. <sup>b</sup> |
|-------|-----------------|--------------|----------|---------|-------------------|
| 1     | <b>Ipty-Ni4</b> | 20           | 10       | 0.64    | 1.92              |
| 2     | <b>Ipty-Ni4</b> | 20           | 20       | 1.52    | 2.28              |
| 3     | <b>Ipty-Ni4</b> | 20           | 30       | 2.13    | 2.13              |
| 4     | <b>Ipty-Ni4</b> | 40           | 10       | 0.73    | 2.19              |
| 5     | <b>Ipty-Ni4</b> | 40           | 20       | 1.74    | 2.61              |
| 6     | <b>Ipty-Ni4</b> | 40           | 30       | 2.53    | 2.53              |
| 7     | <b>Ipty-Ni4</b> | 60           | 10       | 1.06    | 3.18              |
| 8     | <b>Ipty-Ni4</b> | 60           | 20       | 2.31    | 3.47              |
| 9     | <b>Ipty-Ni4</b> | 60           | 30       | 3.13    | 3.13              |
| 10    | <b>Ipty-Ni4</b> | 80           | 10       | 1.02    | 3.06              |
| 11    | <b>Ipty-Ni4</b> | 80           | 20       | 2.21    | 3.31              |
| 12    | <b>Ipty-Ni4</b> | 80           | 30       | 2.67    | 2.67              |
| 13    | <b>Ph-Ni4</b>   | 20           | 10       | 0.17    | 0.51              |
| 14    | <b>Ph-Ni4</b>   | 20           | 20       | 0.39    | 0.59              |
| 15    | <b>Ph-Ni4</b>   | 20           | 30       | 0.57    | 0.57              |
| 16    | <b>Ph-Ni4</b>   | 40           | 10       | 0.28    | 0.84              |
| 17    | <b>Ph-Ni4</b>   | 40           | 20       | 0.56    | 0.84              |
| 18    | <b>Ph-Ni4</b>   | 40           | 30       | 0.83    | 0.83              |
| 19    | <b>Ph-Ni4</b>   | 60           | 10       | 0.52    | 1.56              |
| 20    | <b>Ph-Ni4</b>   | 60           | 20       | 1.01    | 1.52              |
| 21    | <b>Ph-Ni4</b>   | 60           | 30       | 1.54    | 1.54              |
| 22    | <b>Ph-Ni4</b>   | 80           | 10       | 0.65    | 1.95              |
| 23    | <b>Ph-Ni4</b>   | 80           | 20       | 1.25    | 1.88              |
| 24    | <b>Ph-Ni4</b>   | 80           | 30       | 1.83    | 1.83              |

<sup>a</sup> Reaction conditions: Ni catalyst (2 μmol), MAO (500 equiv.), toluene/CH<sub>2</sub>Cl<sub>2</sub> (19 mL/1 mL).

<sup>b</sup> Activity (Act.) = 10<sup>6</sup> g/(mol Ni h).

**Table S2.** Polyethylene Branching Distribution based on <sup>13</sup>C NMR analysis<sup>a</sup>

| polymer     | methyl | ethyl | propyl | butyl+ | Branching density (/1000C) <sup>b</sup> |
|-------------|--------|-------|--------|--------|-----------------------------------------|
| <b>PE-1</b> | 23.4   | 1.2   | 0.7    | 2.7    | 28                                      |
| <b>PE-2</b> | 26.5   | 2.5   | 1.0    | 5.0    | 35                                      |

<sup>a</sup> Sample from Table 1, entries 4 (**PE-1**), 11 (**PE-2**). <sup>b</sup> Measured by <sup>13</sup>C NMR in CDCl<sub>2</sub>CDCl<sub>2</sub> at 110 °C.

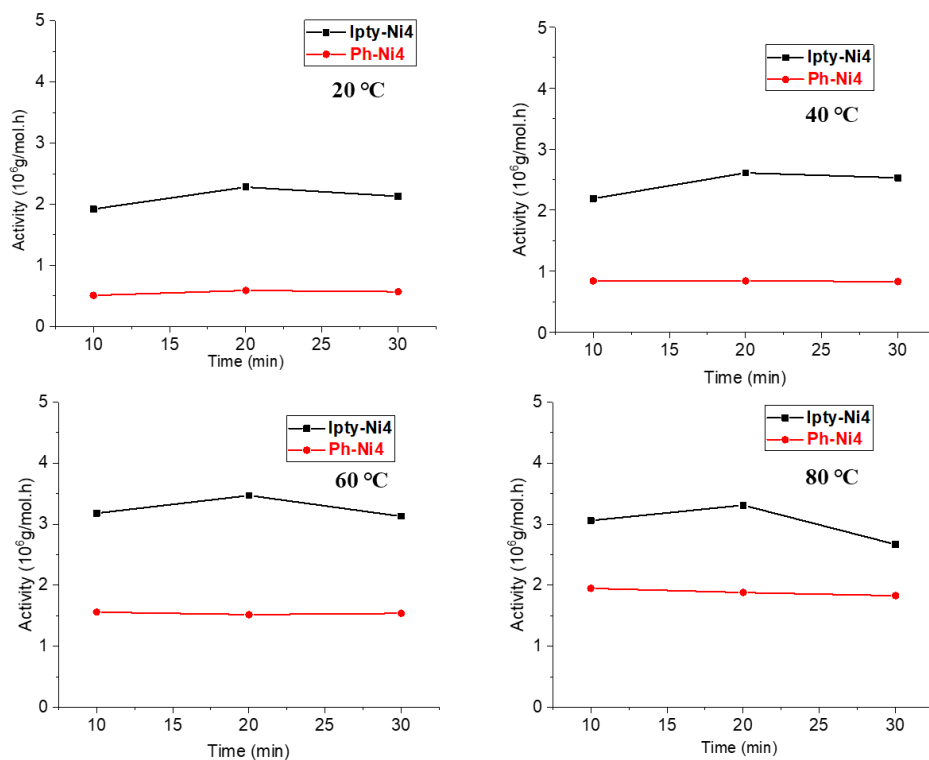

**Figure S1.** Plots of activity versus time and for **lpty-Ni4** (black) and **Ph-Ni4** (red) at 20, 40, 60, 80 °C.

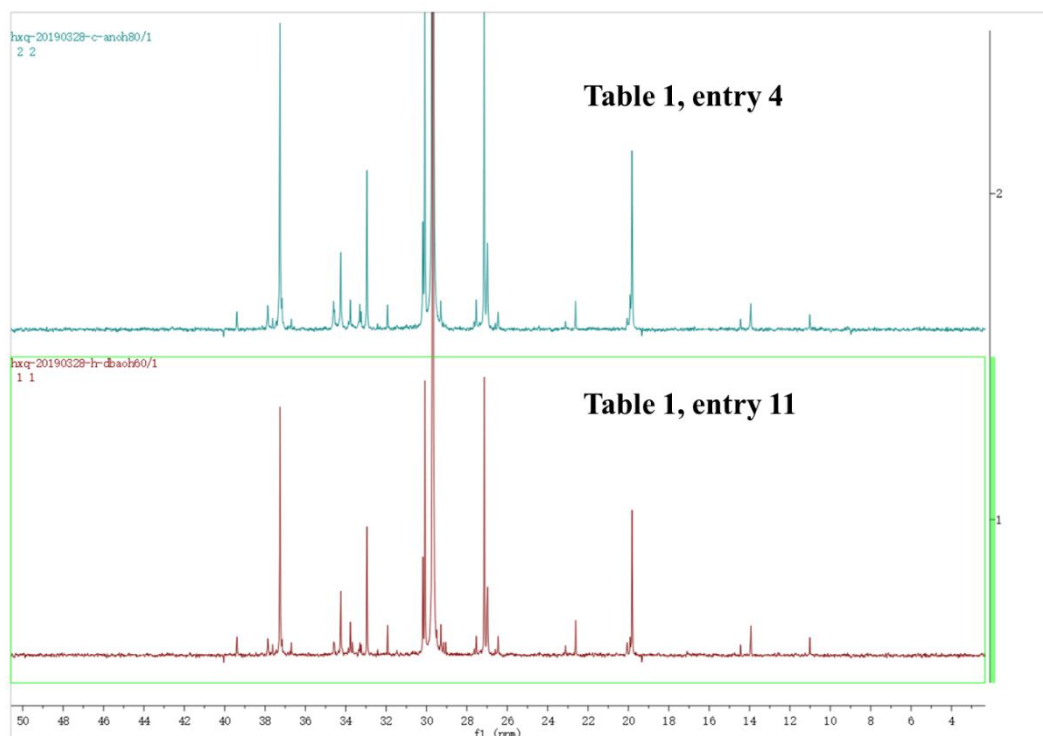

**Figure S2.**  $^{13}\text{C}$  NMR spectra (400 MHz,  $\text{C}_2\text{D}_2\text{Cl}_4$ , 110 °C) of the polymers from table 1, entries 4 and 11.

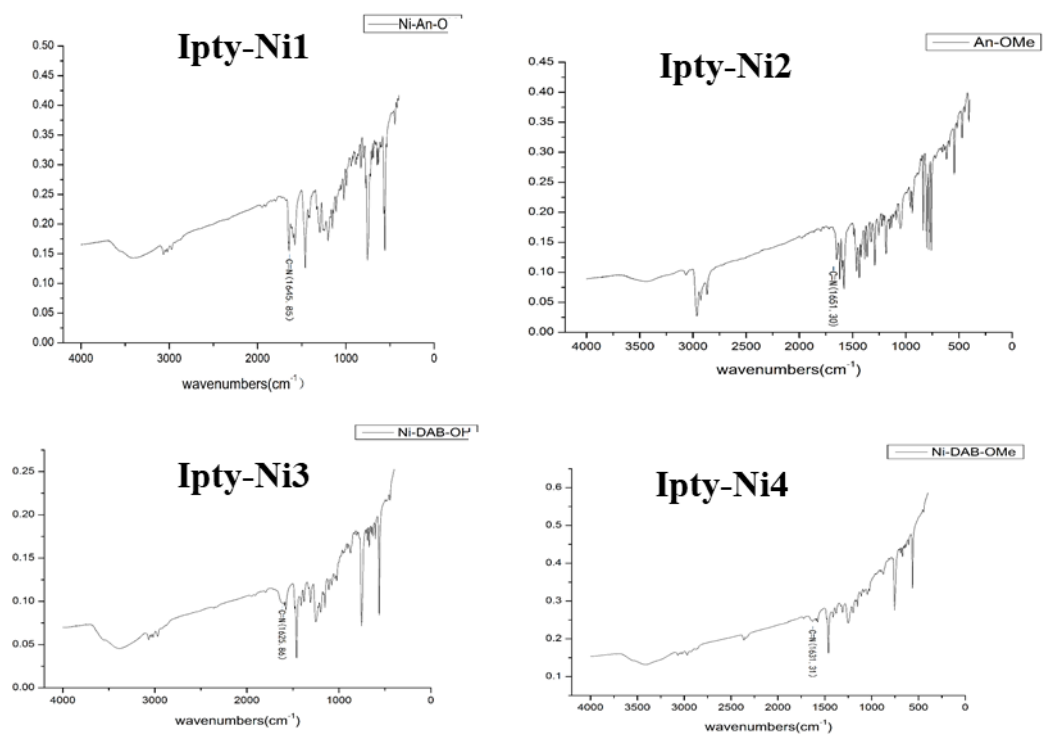

**Figure S3.** FT-IR spectra of the **Ipty-Ni1~4** complexes.

**General Considerations:** All experiments were carried out under a dry Nitrogen atmosphere using standard Schlenk techniques or in a glove-box. Deuterated solvents used for NMR were dried and distilled prior to use.  $^1\text{H}$ ,  $^{13}\text{C}$  NMR spectra were recorded by a Bruker Ascend Tm 400 spectrometer at ambient temperature unless otherwise stated. The chemical shifts of the  $^1\text{H}$  and  $^{13}\text{C}$  NMR spectra were referenced to the residual solvent; Coupling constants are in Hz. Elemental analysis were performed at the National Analytical Research Centre of Changchun Institute of Applied Chemistry. X-ray Diffraction data were collected at 298(2) K on a Bruker Smart CCD area detector with graphite-monochromated Mo  $K\alpha$  radiation ( $\lambda = 0.71073 \text{ \AA}$ ). Molecular weight and molecular weight distribution of the polymers with low solubility at room temperature were determined by gel permeation chromatography (GPC) with a PL 210 equipped with one Shodex AT-803S and two Shodex AT-806MS columns at 150 °C using trichlorobenzene as a solvent and calibrated with polystyrene standards. The molecular weight and the molecular weight distribution of the polymers with good solubility at room temperature were determined by gel permeation chromatography (GPC) equipped with two linear Styragel columns (HR2 and HR4) at 40 °C using THF as a solvent and calibrated with polystyrene standards, and THF was employed as the eluent at a flow rate of 1.0 mL/min. Melting points ( $T_m$ ) of polyethylenes and copolymers were measured through DSC analyses, which were carried out under a nitrogen atmosphere at heating and cooling rates of 10 °C/min.

## Preparation of Ligands and Catalysts

The ligands (**Ipty-OH1**, **Ipty-OH3**, **Ipty-OMe2** and **Ipty-OMe4**) were prepared using literature procedure.<sup>1</sup> The ligand **Ph-L4** and the corresponding nickel complexes **Ph-Ni4** and the palladium complexes **Ph-Pd4** were previously reported by the Chen group.<sup>2,3</sup>

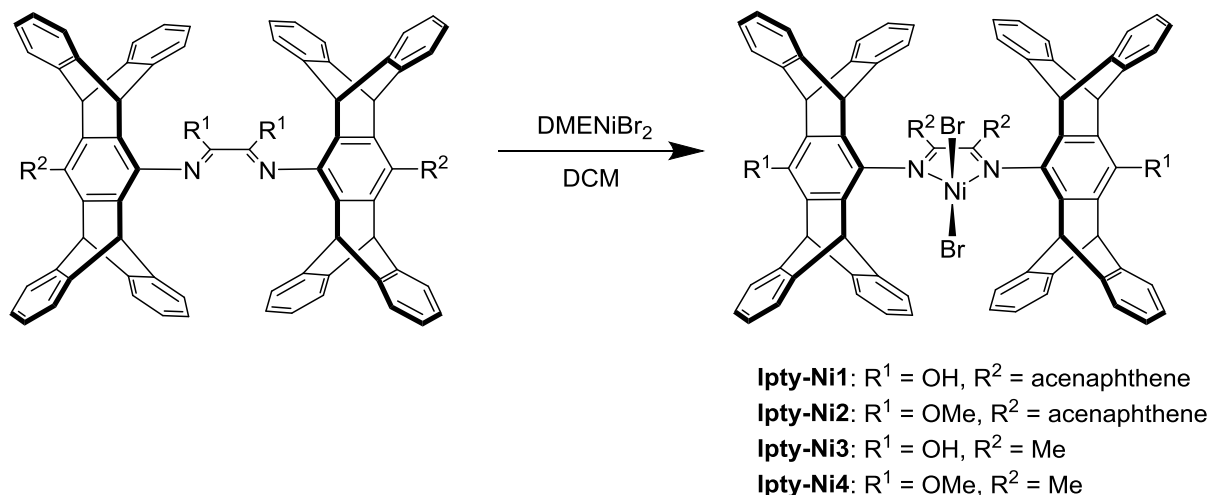

**Preparation of Ipty-Ni complexes:** The nickel complexes were prepared in a similar manner by the reaction of 0.2 mmol ligand with 1 equivalent  $\text{NiBr}_2(\text{DME})$  in dichloromethane. After stirring overnight, the solvent was removed, and the brown solid powder was washed with ether (10 mL  $\times$  2) and dried under vacuum to give the corresponding nickel complexes.

**Ipty-Ni1:** (0.206 g, 80%).  $^1\text{H}$  NMR (300 MHz,  $\text{CDCl}_3$ )  $\delta$  19.45 (s, 2H,  $\text{CHAr}_3$ ), 16.27 (s, 2H,  $\text{CHAr}_3$ ), 9.63 (s, 2H, OH). FT-IR: 1645.85  $\text{cm}^{-1}$  (C=N). MALDI-TOF-MS ( $m/z$ ): Calcd for  $\text{C}_{80}\text{H}_{48}\text{Br}_2\text{N}_2\text{NiO}_2$ : 1286.14; Found: 1207.17  $[\text{M}-\text{Br}]^+$ . Elemental analysis: calc. For

$C_{80}H_{48}Br_2N_2NiO_2$  (1287.78 g mol<sup>-1</sup>): C, 74.62; H, 3.76; N, 2.18. Found: C, 74.48; H, 3.74; N, 2.23.

**Ipty-Ni2:** (0.221 g, 84%). <sup>1</sup>H NMR (300 MHz, CDCl<sub>3</sub>) δ 17.93 (s, 2H, CHAr<sub>3</sub>), 15.46 (s, 2H, CHAr<sub>3</sub>), 4.26 (s, 6H, OMe). FT-IR: 1651.30 cm<sup>-1</sup> (C=N) MALDI-TOF-MS (m/z): Calcd for C<sub>82</sub>H<sub>52</sub>Br<sub>2</sub>N<sub>2</sub>NiO<sub>2</sub>: 1314.17; Found: 1235.20 [M-Br]<sup>+</sup>. Elemental analysis: calc. For C<sub>82</sub>H<sub>52</sub>Br<sub>2</sub>N<sub>2</sub>NiO<sub>2</sub> (1315.83 g mol<sup>-1</sup>): C, 74.85; H, 3.98; N, 2.13. Found: C, 74.59; H, 3.89; N, 2.07.

**Ipty-Ni3:** (0.195 g, 83%). <sup>1</sup>H NMR (300 MHz, THF-*d*<sub>8</sub>) δ 12.82 (s, 2H, OH), -20.53 (s, 6H, CH<sub>3</sub>). FT-IR: 1625.86 cm<sup>-1</sup> (C=N) MALDI-TOF-MS (m/z): Calcd for C<sub>72</sub>H<sub>48</sub>Br<sub>2</sub>N<sub>2</sub>NiO<sub>2</sub>: 1190.14; Found: 1111.19 [M-Br]<sup>+</sup>. Elemental analysis: calc. For C<sub>72</sub>H<sub>48</sub>Br<sub>2</sub>N<sub>2</sub>NiO<sub>2</sub> (1191.69 g mol<sup>-1</sup>): C, 72.57; H, 4.06; N, 2.35. Found: C, 72.29; H, 3.89; N, 2.23.

**Ipty-Ni4:** (0.207 g, 85%). <sup>1</sup>H NMR (300 MHz, CDCl<sub>3</sub>) δ 17.28 (d, *J* = 6.8 Hz, 4H, CHAr<sub>3</sub>), -15.91 (s, 6H, CH<sub>3</sub>). FT-IR: 1631.31 cm<sup>-1</sup> (C=N). MALDI-TOF-MS (m/z): Calcd for C<sub>74</sub>H<sub>52</sub>Br<sub>2</sub>N<sub>2</sub>NiO<sub>2</sub>: 1218.17; Found: 1139.02 [M-Br]<sup>+</sup>. Elemental analysis: calc. For C<sub>74</sub>H<sub>52</sub>Br<sub>2</sub>N<sub>2</sub>NiO<sub>2</sub> (1219.74 g mol<sup>-1</sup>): C, 72.87; H, 4.30; N, 2.30. Found: C, 72.99; H, 4.39; N, 2.17.

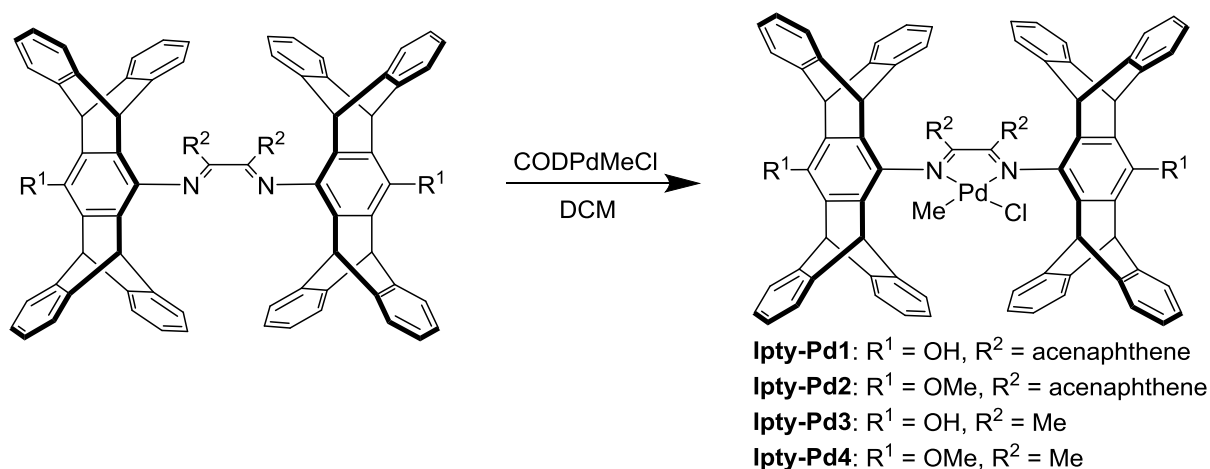

**Preparation of Ipty-Pd complexes:** To a solution of ligand (1 mmol) in dry CH<sub>2</sub>Cl<sub>2</sub> (40 mL) was added 265 mg (1 mmol) of PdMeCl(COD). After stirring the mixture for 3 days at room temperature, Complex **Ipty-Pd2** was isolated using column chromatography. The mixture was eluted on silica gel with first 1:1 hexanes/CH<sub>2</sub>Cl<sub>2</sub> then pure CH<sub>2</sub>Cl<sub>2</sub> as the mobile phase. The pure complex **Ipty-Pd2** was obtained as an orange solid. Complexes **Ipty-Pd1**, **Ipty-Pd3**, **Ipty-Pd4** was isolated by filtration, washed three times by 20 mL CH<sub>2</sub>Cl<sub>2</sub> to remove the excess PdMeCl(COD) and ligand. The pure compound was obtained as an orange or yellow solid. Complexes **Ipty-Pd1**, **Ipty-Pd3**, **Ipty-Pd4** have poor solubility in almost all solvents, so the <sup>13</sup>C NMR spectrum of these complexes can't be collected.

**Ipty-Pd1:** (0.91 g, 74%). <sup>1</sup>H NMR (400 MHz, DMSO) δ 9.81 (s, 2H, OH), 7.99 (d, *J* = 8.2 Hz, 2H, Ar-*H*), 7.62 (d, *J* = 7.0 Hz, 4H, Ar-*H*), 7.50 (d, *J* = 5.5 Hz, 4H, Ar-*H*), 7.44 (d, *J* = 7.1 Hz, 4H, Ar-*H*), 7.10-7.00 (m, 8H, Ar-*H*), 6.85 (d, *J* = 6.9 Hz, 4H, Ar-*H*), 6.72 – 6.43 (m, 10H, Ar-

*H*), 6.14 (s, 4H, *CHAr*<sub>3</sub>), 5.92 (s, 4H, *CHAr*<sub>3</sub>), 5.18 (s, 2H, *Ar-H*), 0.98 (s, 3H, *Pd-Me*). Elemental analysis: calc. For C<sub>81</sub>H<sub>51</sub>ClN<sub>2</sub>O<sub>2</sub>Pd (1226.18 g mol<sup>-1</sup>): C, 79.34; H, 4.19; N, 2.28. Found: C, 79.57; H, 4.25; N, 2.36. MALDI-TOF-MS (*m/z*): Calcd for C<sub>81</sub>H<sub>51</sub>ClN<sub>2</sub>O<sub>2</sub>Pd: 1224.27; Found: 1175.73 [M-Me-Cl]<sup>+</sup>.

**Ipty-Pd2:** (1.18 g, 94%). <sup>1</sup>H NMR (400 MHz, CDCl<sub>3</sub>) δ 7.83 – 7.56 (m, 4H, *Ar-H*), 7.51 – 7.27 (m, 10H, *Ar-H*), 7.08–6.97 (m, 8H, *Ar-H*), 6.86 – 6.68 (m, 4H, *Ar-H*), 6.54–6.37 (m, 10H, *Ar-H*), 5.89–5.76 (m, 8H, *CHAr*<sub>3</sub>), 5.13 (d, *J* = 7.2 Hz, 1H, *Ar-H*), 5.07 (d, *J* = 7.2 Hz, 1H, *Ar-H*), 4.14 (s, 6H, *OMe*), 0.76 (s, 3H, *Pd-Me*). <sup>13</sup>C NMR (101 MHz, CDCl<sub>3</sub>) δ 173.57 (*C=N-Ar*), 170.16 (*C=N-Ar*), 149.32 (*C-OMe*), 149.04 (*C-OMe*), 145.70, 145.10, 145.05, 144.52, 144.22, 144.01, 143.87, 143.64, 137.54, 136.78, 136.21, 135.48, 128.19, 125.90, 125.83, 125.69, 125.35, 125.15, 124.84, 124.75, 124.49, 123.81, 123.68, 123.47, 123.29, 123.03, 122.75, 63.49 (*OMe*), 63.44 (*OMe*), 50.11 (*CHAr*<sub>3</sub>), 49.68 (*CHAr*<sub>3</sub>), 4.26 (*Pd-Me*). Elemental analysis: calc. For C<sub>83</sub>H<sub>55</sub>ClN<sub>2</sub>O<sub>2</sub>Pd (1252.30 g mol<sup>-1</sup>): C, 79.48; H, 4.42; N, 2.23. Found: C, 79.34; H, 4.36; N, 2.52. MALDI-TOF-MS (*m/z*): Calcd for C<sub>83</sub>H<sub>55</sub>ClN<sub>2</sub>O<sub>2</sub>Pd: 1252.30; Found: 1204.09 [M-Me-Cl]<sup>+</sup>.

**Ipty-Pd3:** (0.54 g, 48%). <sup>1</sup>H NMR (400 MHz, DMSO) δ 9.24 (s, 2H, *OH*), δ 7.52 – 7.30 (m, 16H, *Ar-H*), 7.08 – 6.90 (m, 16H, *Ar-H*), 6.04 (s, 4H, *CHAr*<sub>3</sub>), 5.38 (s, 4H, *CHAr*<sub>3</sub>), 2.05 (s, 6H, *Me-C=N*), 0.97 (s, 3H, *Pd-Me*). Elemental analysis: calc. For C<sub>73</sub>H<sub>51</sub>ClN<sub>2</sub>O<sub>2</sub>Pd (1128.27 g mol<sup>-1</sup>): C, 77.59; H, 4.55; N, 2.48. Found: C, 77.76; H, 4.45; N, 2.43. MALDI-TOF-MS (*m/z*): Calcd for C<sub>73</sub>H<sub>51</sub>ClN<sub>2</sub>O<sub>2</sub>Pd: 1128.27; Found: 1079.79 [M-Me-Cl]<sup>+</sup>.

**Ipty-Pd4:** (0.74 g, 64%). <sup>1</sup>H NMR (400 MHz, DMSO) δ 7.52 (s, 12H, *Ar-H*), 7.39 (d, *J* = 6.0 Hz, 4H, *Ar-H*), 7.20 – 6.88 (m, 16H, *Ar-H*), 5.91 (s, 4H, *CHAr*<sub>3</sub>), 5.44 (s, 4H, *CHAr*<sub>3</sub>), 3.93 (s, 6H, *OMe*), 2.08 (s, 6H, *Me-C=N*), 0.96 (s, 3H, *Pd-Me*). Elemental analysis: calc. For C<sub>75</sub>H<sub>55</sub>ClN<sub>2</sub>O<sub>2</sub>Pd (1158.15 g mol<sup>-1</sup>): C, 77.78; H, 4.79; N, 2.42. Found: C, 77.65; H, 4.66; N, 2.36. MALDI-TOF-MS (*m/z*): Calcd for C<sub>75</sub>H<sub>55</sub>ClN<sub>2</sub>O<sub>2</sub>Pd: 1156.30; Found: 1108.03 [M-Me-Cl]<sup>+</sup>.

### A general procedure for the homopolymerization of ethylene using Ipty-Ni complexes.

In a typical experiment, a 300 mL stainless pressure reactor connected with a high pressure gas line was firstly dried at 90 °C under vacuum for at least 1 h. The reactor was then adjusted to the desired polymerization temperature. 20 mL of toluene and the desired amount MAO was added to the reactor under N<sub>2</sub> atmosphere, then the desired amount of catalyst in 1 mL of CH<sub>2</sub>Cl<sub>2</sub> was injected into the polymerization system via syringe. With a rapid stirring, the reactor was pressurized and maintained at 6 atm of ethylene. After 30 min, the pressure reactor was vented and the polymer was precipitated in ethanol, filtered and dried at 50 °C for at least 24 h under vacuum.

### A general procedure for the homopolymerization of ethylene using Ipty-Pd complexes.

In a typical experiment, a 300 mL stainless pressure reactor connected with a high pressure gas line was firstly dried at 90 °C under vacuum for at least 1 h. The reactor was then adjusted to the desired polymerization temperature. 38 mL of DCM and the desired amount NaBArF was added to the reactor under N<sub>2</sub> atmosphere, then the desired amount of catalyst in 2 mL of CH<sub>2</sub>Cl<sub>2</sub>

was injected into the polymerization system via syringe. With a rapid stirring, the reactor was pressurized and maintained at 4 atm of ethylene. After 12 h, the pressure reactor was vented and the polymer was dried under vacuum overnight.

**A general procedure for the copolymerization of polar monomer with ethylene using Ipty-Pd complexes.**

In a typical experiment, a 300 mL stainless pressure reactor connected with a high pressure gas line was firstly dried at 90 °C under vacuum for at least 1 h. The reactor was then adjusted to the desired polymerization temperature. 18 mL of DCM with the desired amount NaBARF was added to the reactor under N<sub>2</sub> atmosphere, then the desired polar monomer and the desired amount of Pd catalyst in 2 mL of CH<sub>2</sub>Cl<sub>2</sub> was injected into the polymerization system via syringe subsequently. With a rapid stirring, the reactor was pressurized and maintained at the desired pressure of ethylene. After 12 h, the pressure reactor was vented and the copolymer was dried under vacuum overnight.



## NMR figures of ligands and catalysts

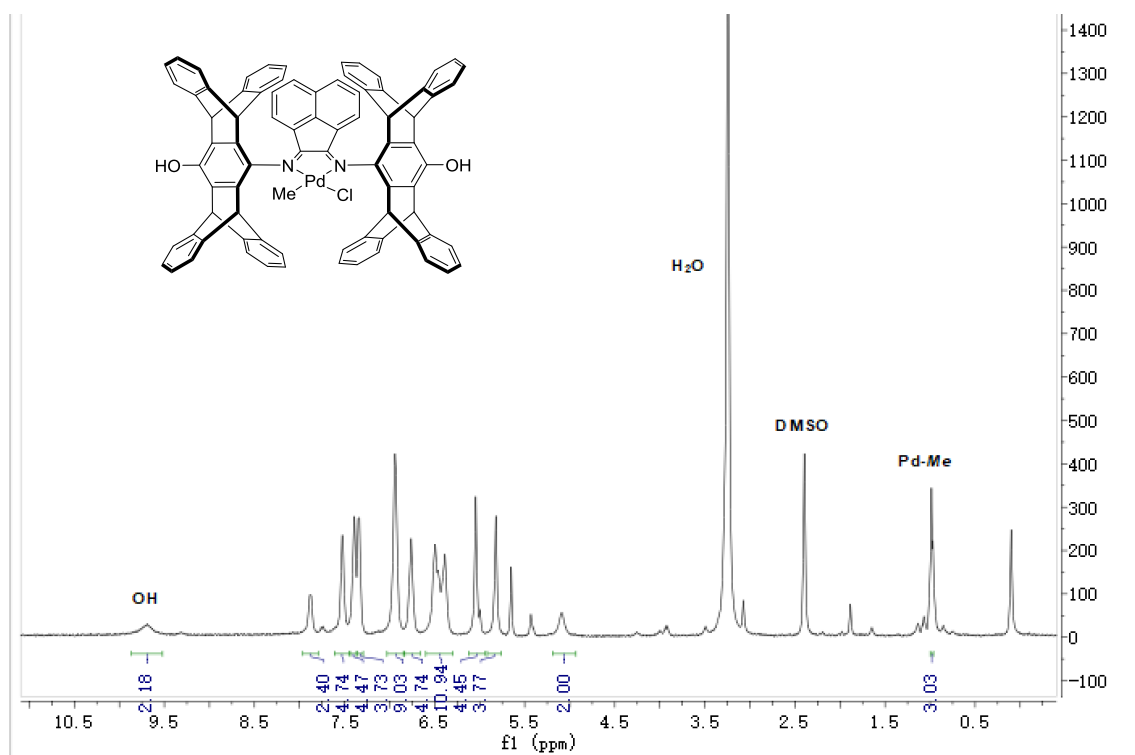

**Figure S4.** <sup>1</sup>H NMR spectrum (400 MHz, CDCl<sub>3</sub>) of Ipty-Pd1.

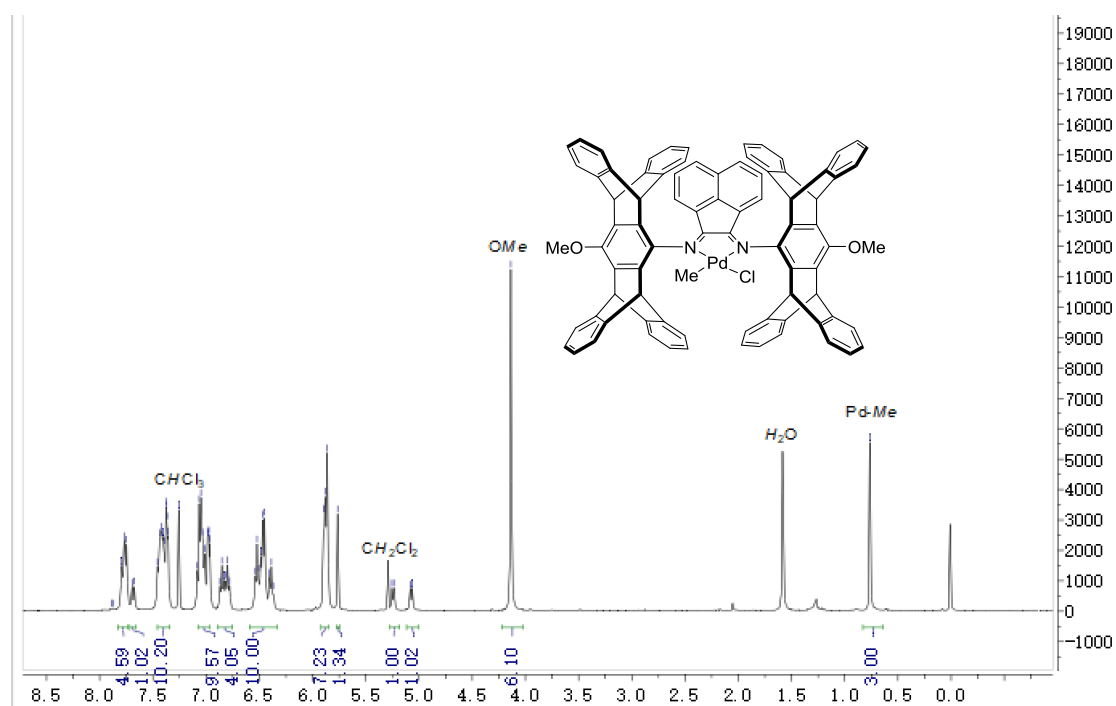

**Figure S5.** <sup>1</sup>H NMR spectrum (400 MHz, CDCl<sub>3</sub>) of Ipty-Pd2.

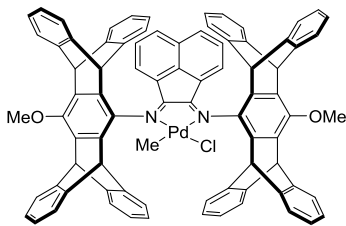

**Figure S6.**  $^{13}\text{C}$  NMR spectrum (101 MHz,  $\text{CDCl}_3$ ) of **Ipty-Pd2**.

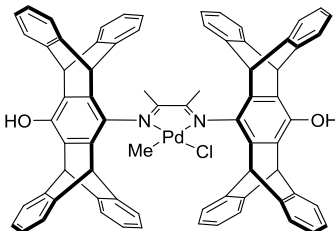

**Figure S7.**  $^1\text{H}$  NMR spectrum (400 MHz, DMSO) of **Ipty-Pd3**.

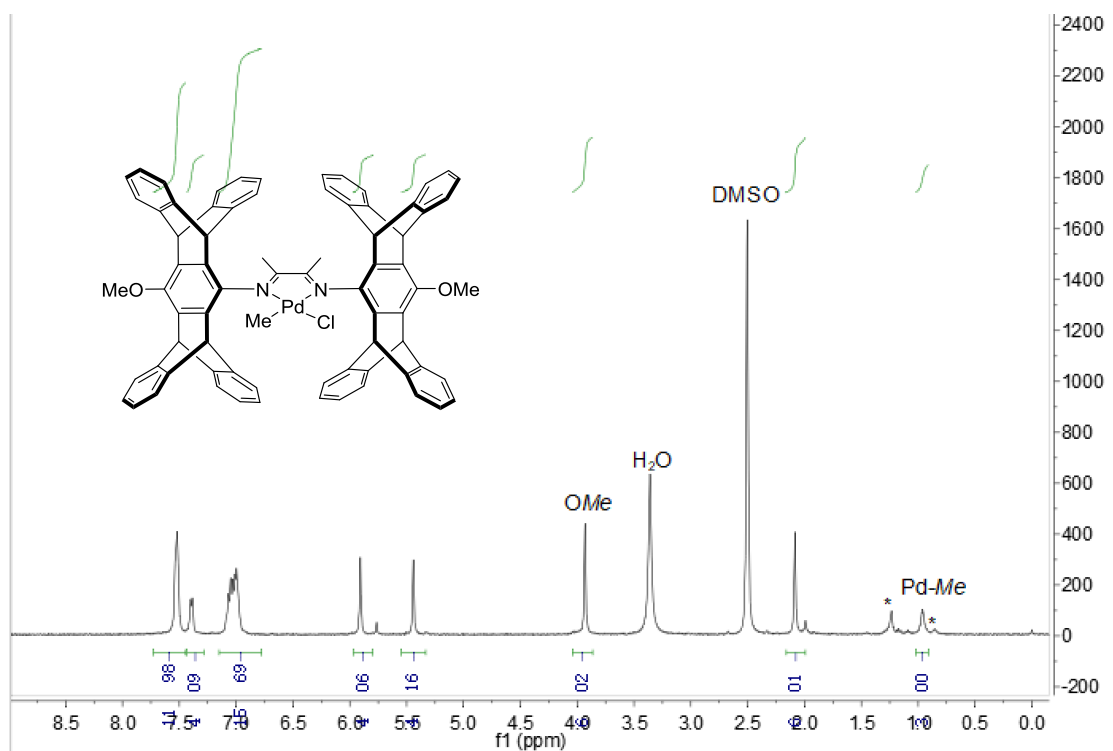

**Figure S8.** <sup>1</sup>H NMR spectrum (400 MHz, DMSO) of **Ipty-Pd4**.

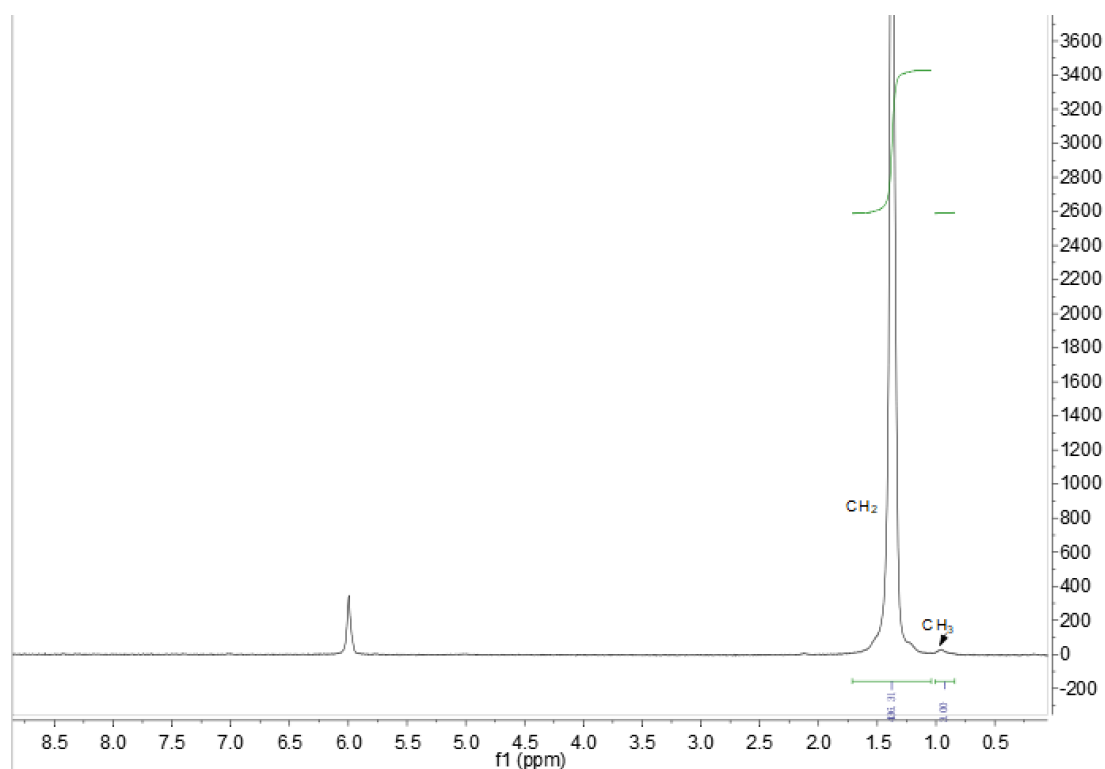

**Figure S9.** <sup>1</sup>H NMR spectrum (400 MHz, C<sub>2</sub>D<sub>2</sub>Cl<sub>4</sub>, 120 °C) of the polymer from table 1, entry 1.

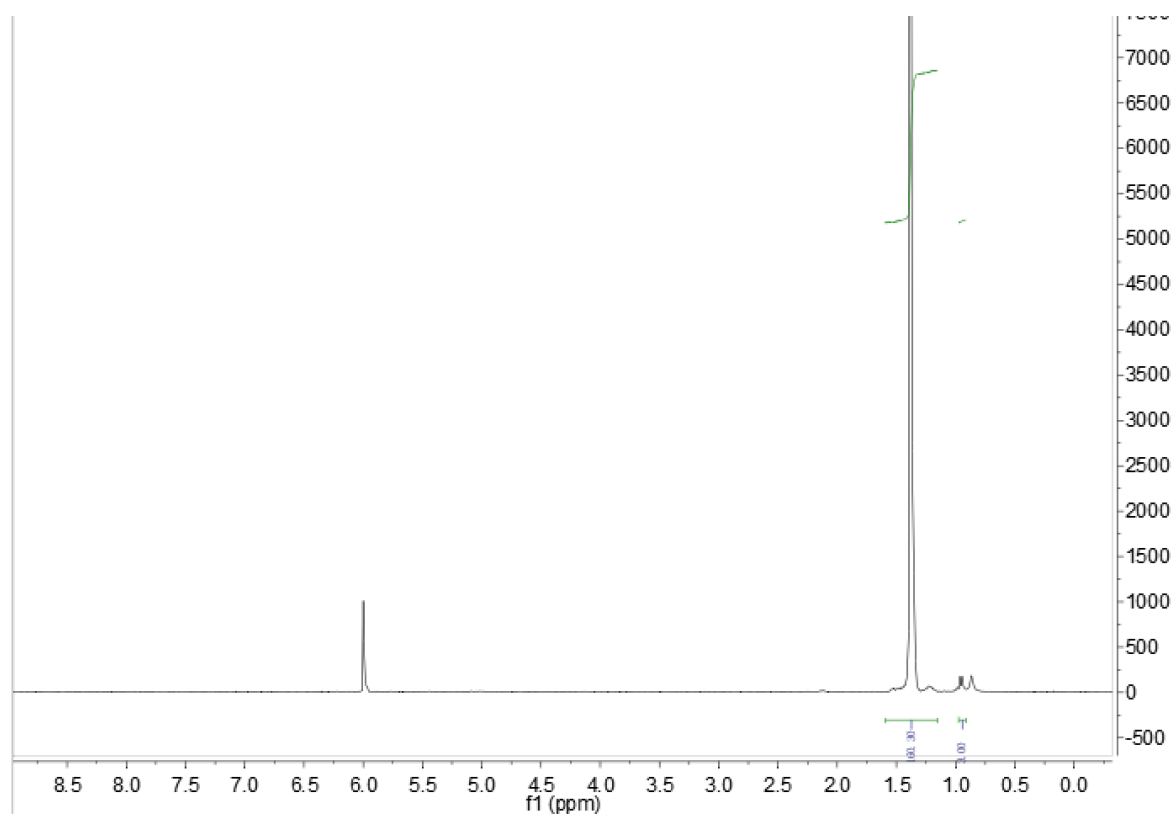

**Figure S10.**  $^1\text{H}$  NMR spectrum (400 MHz,  $\text{C}_2\text{D}_2\text{Cl}_4$ , 120  $^\circ\text{C}$ ) of the polymer from table 1, entry 2.

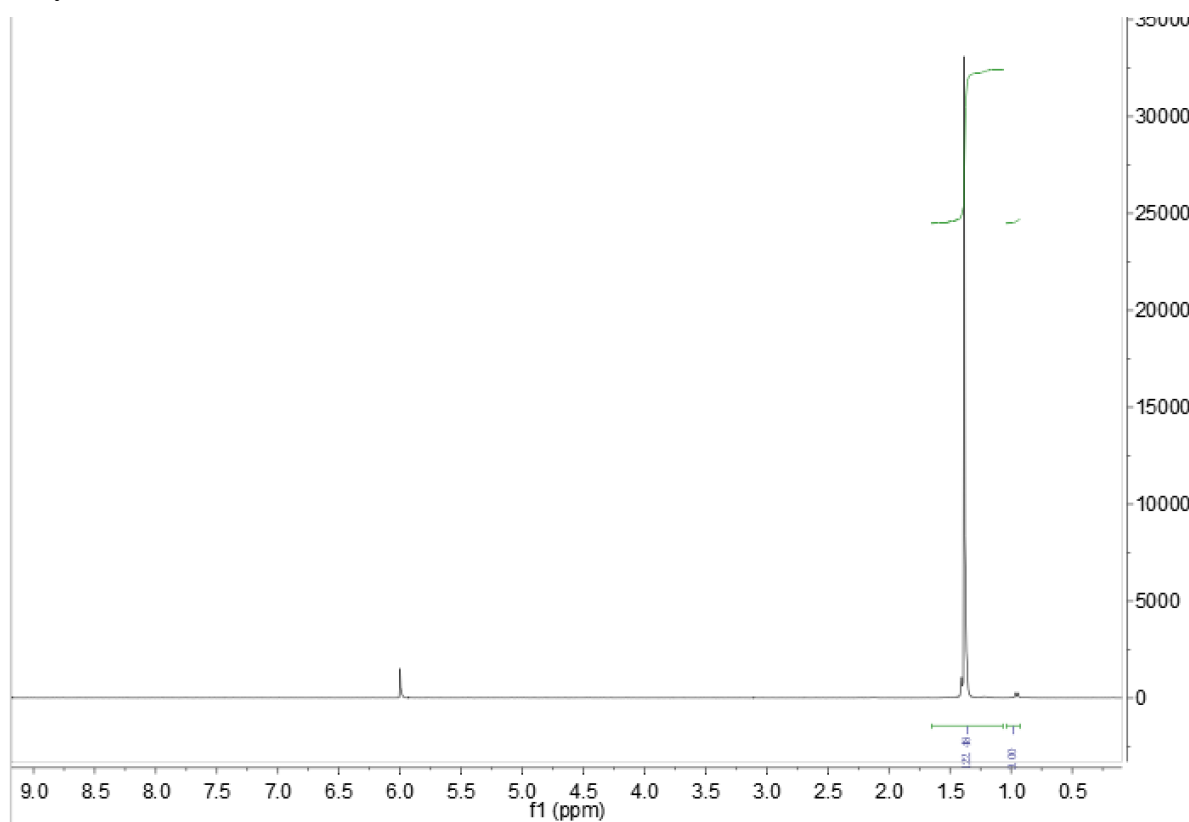

**Figure S11.**  $^1\text{H}$  NMR spectrum (400 MHz,  $\text{C}_2\text{D}_2\text{Cl}_4$ , 120  $^\circ\text{C}$ ) of the polymer from table 1, entry 3.

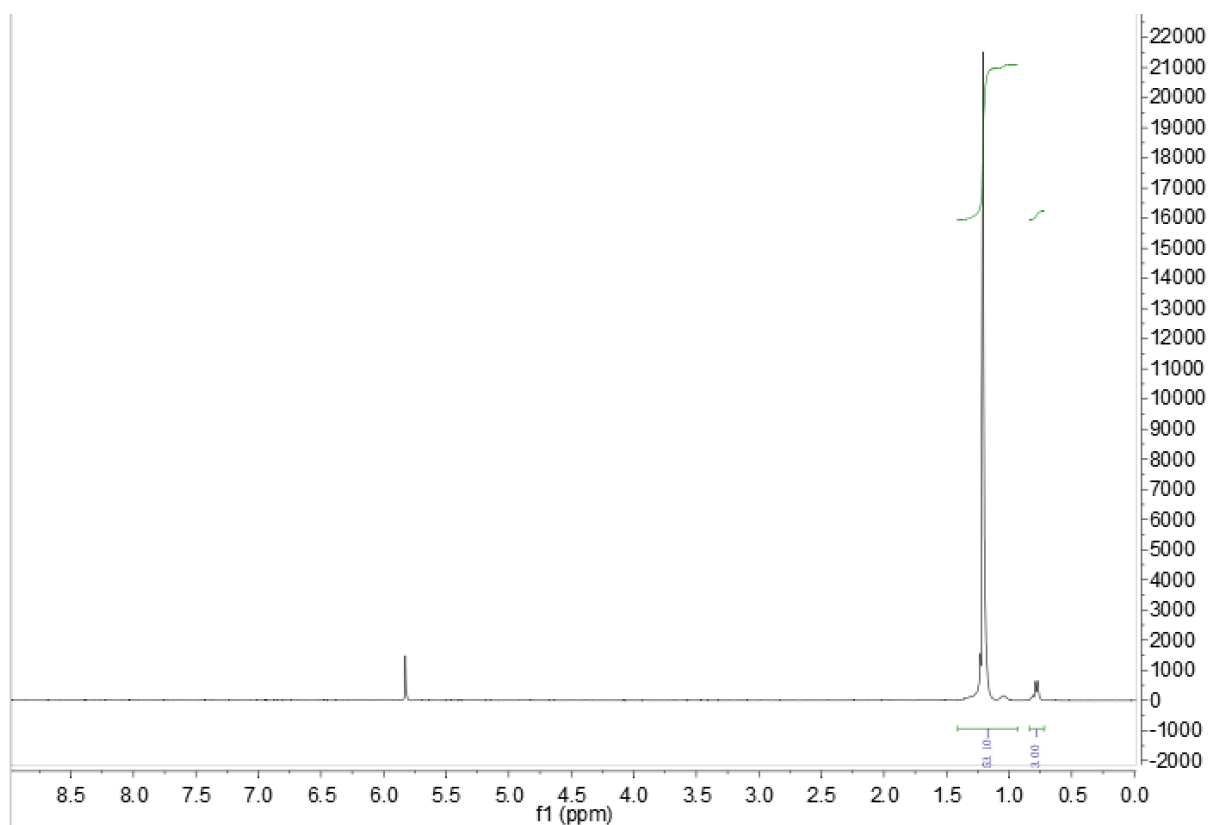

**Figure S12.** <sup>1</sup>H NMR spectrum (400 MHz, C<sub>2</sub>D<sub>2</sub>Cl<sub>4</sub>, 120 °C) of the polymer from table 1, entry 4.

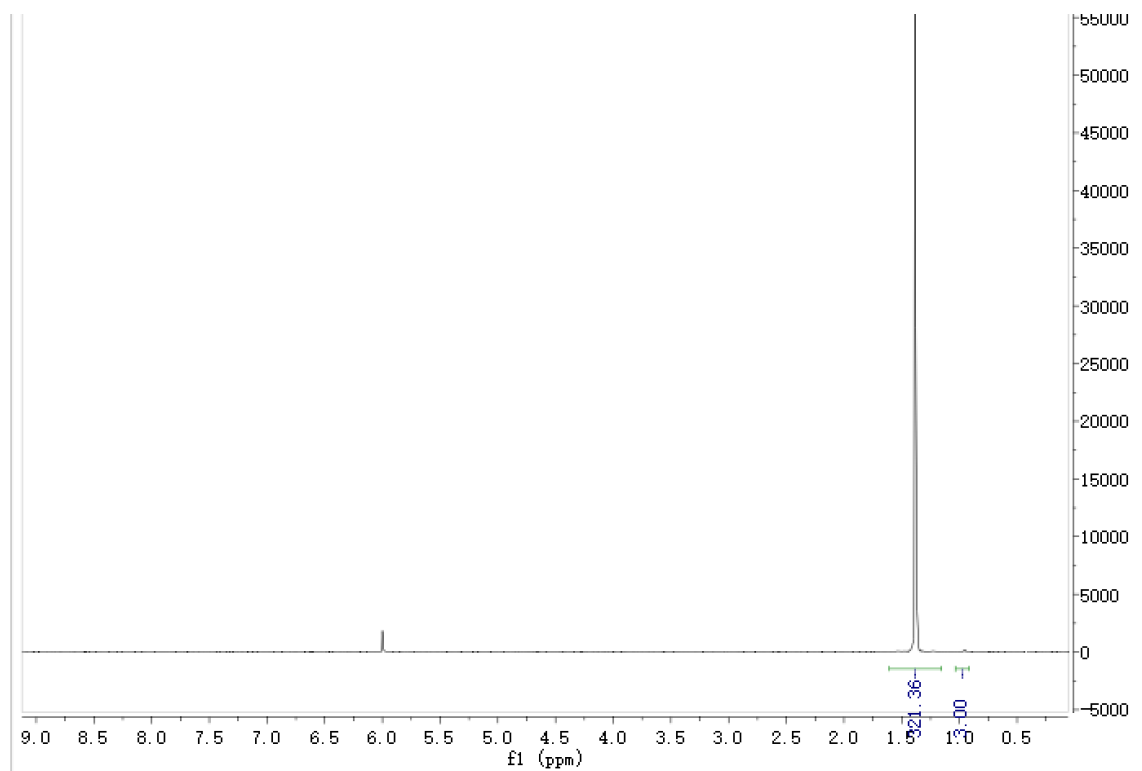

**Figure S13.** <sup>1</sup>H NMR spectrum (400 MHz, C<sub>2</sub>D<sub>2</sub>Cl<sub>4</sub>, 120 °C) of the polymer from table 1, entry 5.

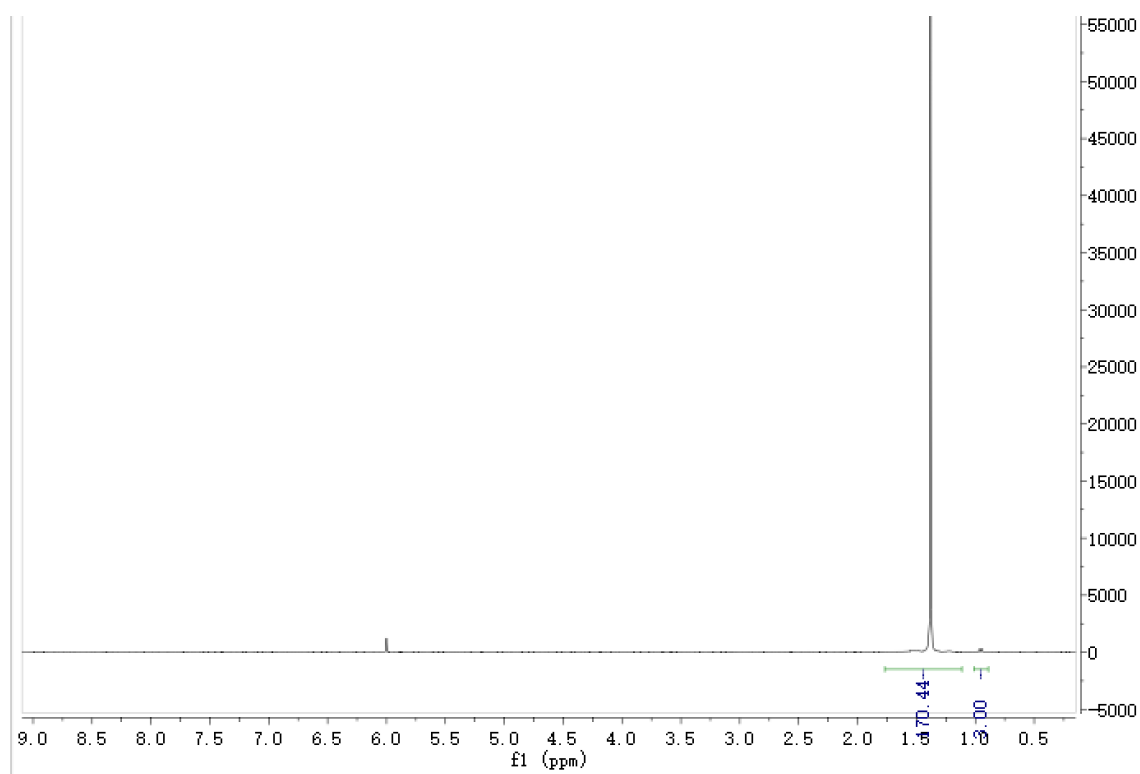

**Figure S14.**  $^1\text{H}$  NMR spectrum (400 MHz,  $\text{C}_2\text{D}_2\text{Cl}_4$ , 120  $^\circ\text{C}$ ) of the polymer from table 1, entry 6.

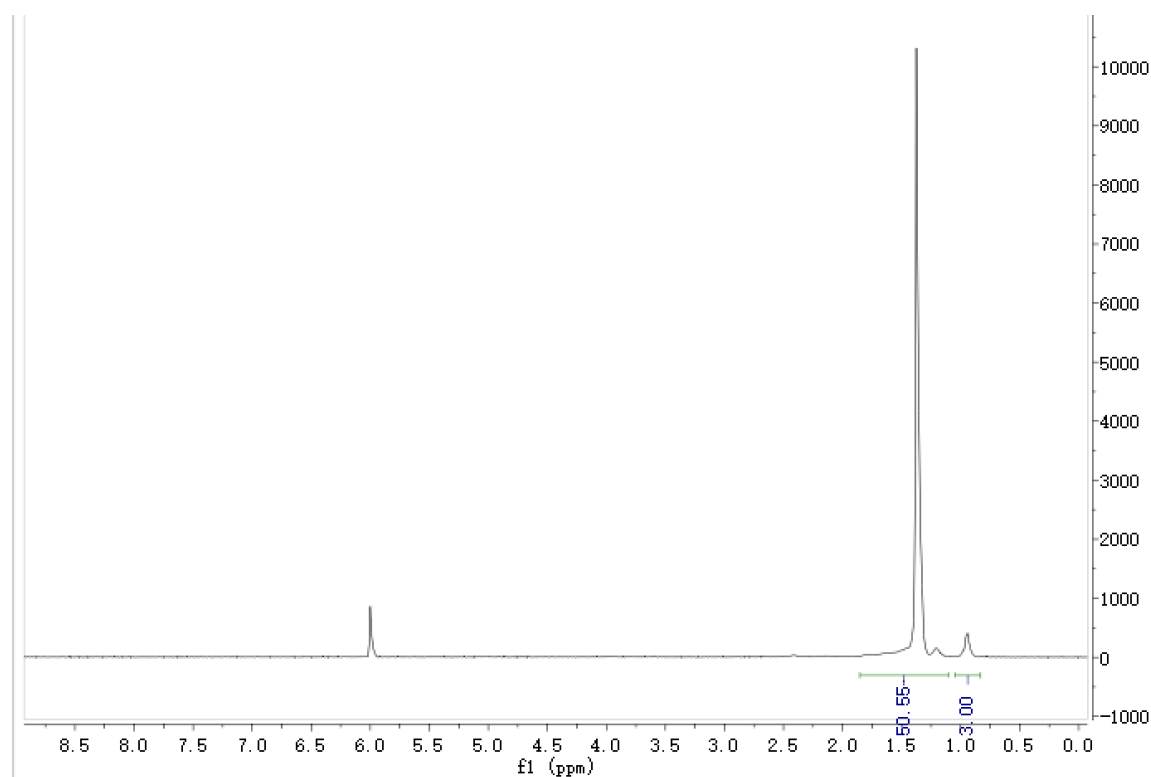

**Figure S15.**  $^1\text{H}$  NMR spectrum (400 MHz,  $\text{C}_2\text{D}_2\text{Cl}_4$ , 120  $^\circ\text{C}$ ) of the polymer from table 1, entry 8.

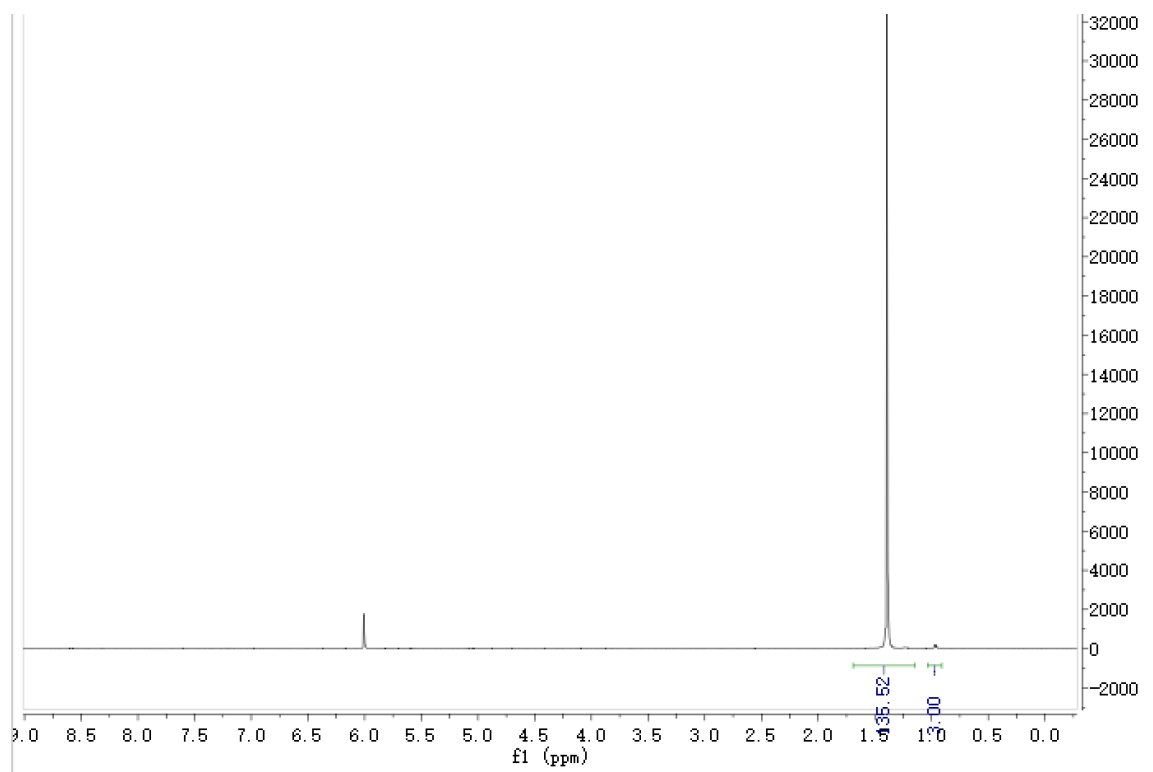

**Figure S16.** <sup>1</sup>H NMR spectrum (400 MHz, C<sub>2</sub>D<sub>2</sub>Cl<sub>4</sub>, 120 °C) of the polymer from table 1, entry 9.

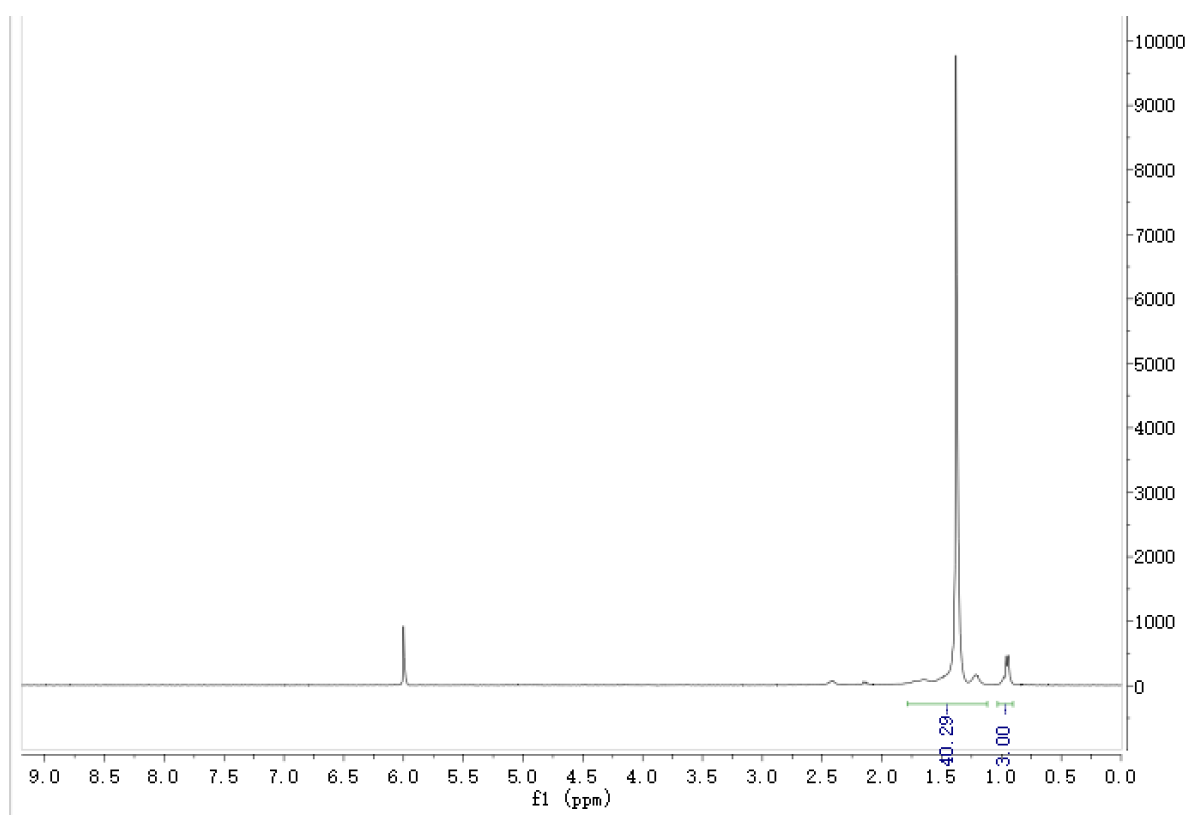

**Figure S17.** <sup>1</sup>H NMR spectrum (400 MHz, C<sub>2</sub>D<sub>2</sub>Cl<sub>4</sub>, 120 °C) of the polymer from table 1, entry 12.

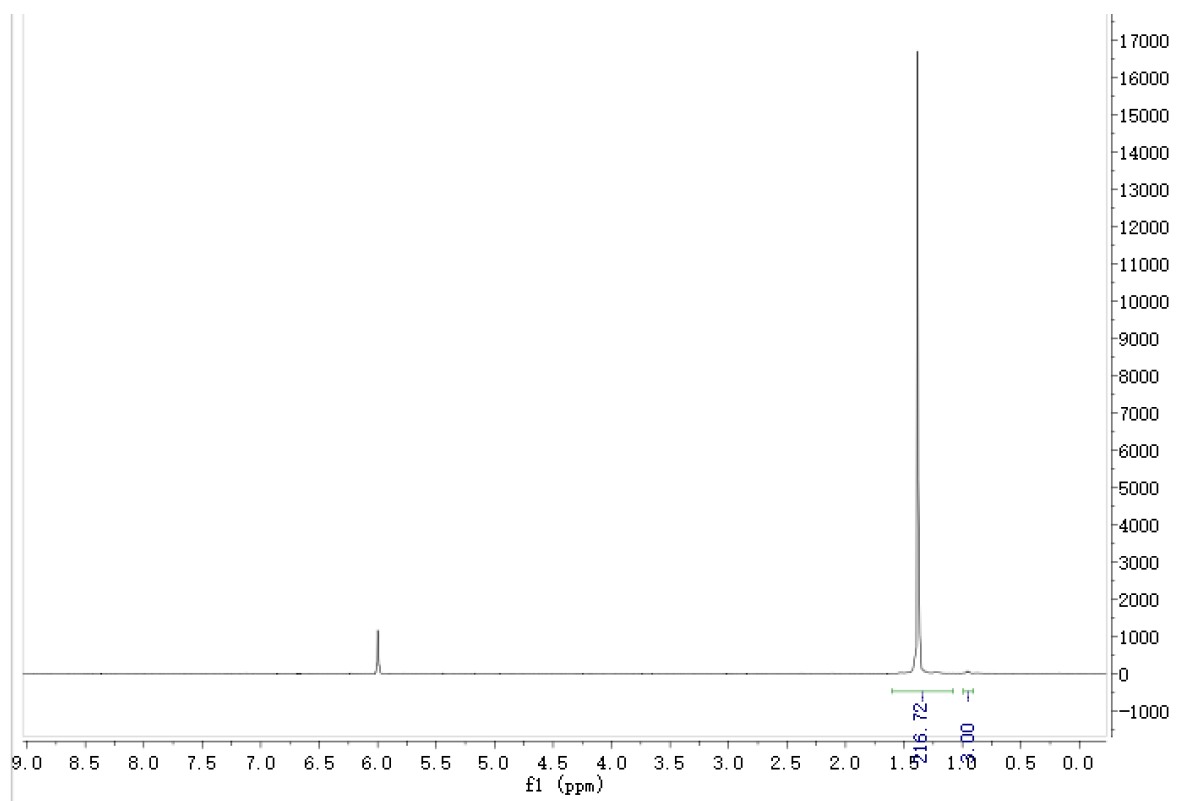

**Figure S18.**  $^1\text{H}$  NMR spectrum (400 MHz,  $\text{C}_2\text{D}_2\text{Cl}_4$ , 120  $^\circ\text{C}$ ) of the polymer from table 1, entry 13.

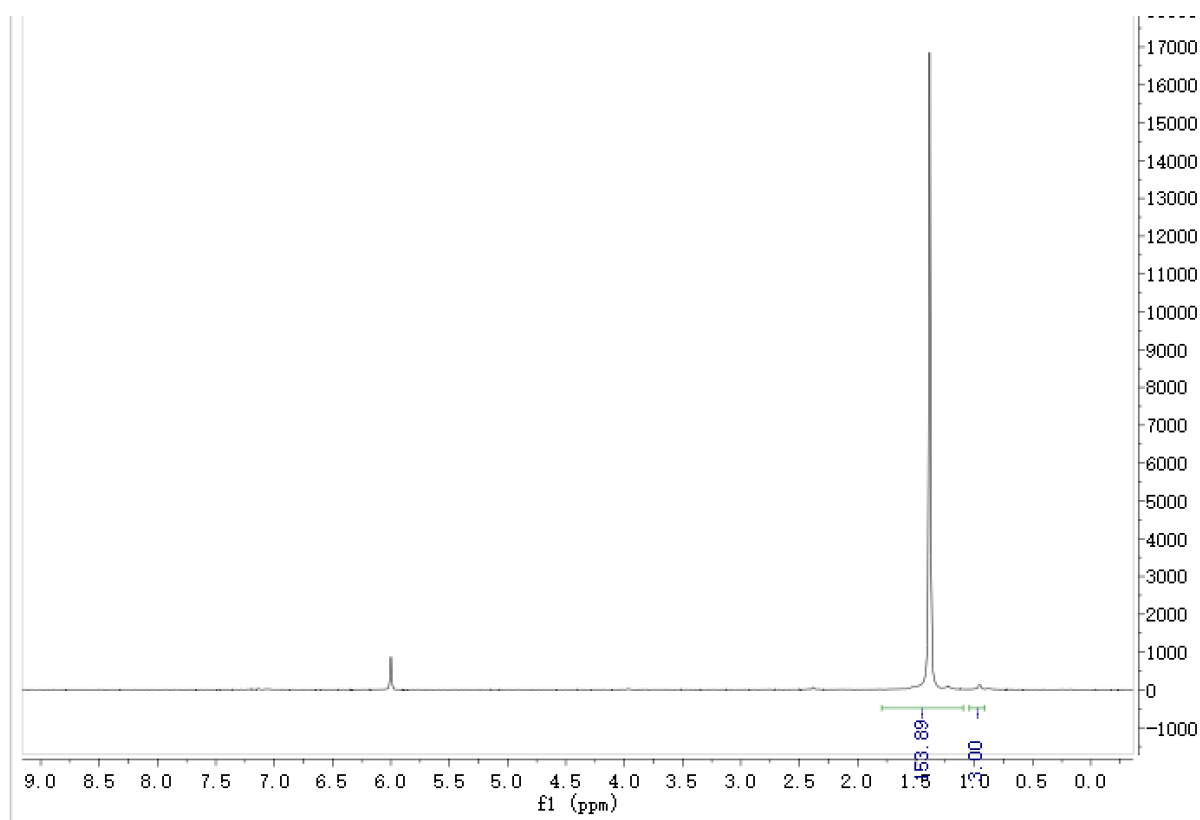

**Figure S19.**  $^1\text{H}$  NMR spectrum (400 MHz,  $\text{C}_2\text{D}_2\text{Cl}_4$ , 120  $^\circ\text{C}$ ) of the polymer from table 1, entry 14.



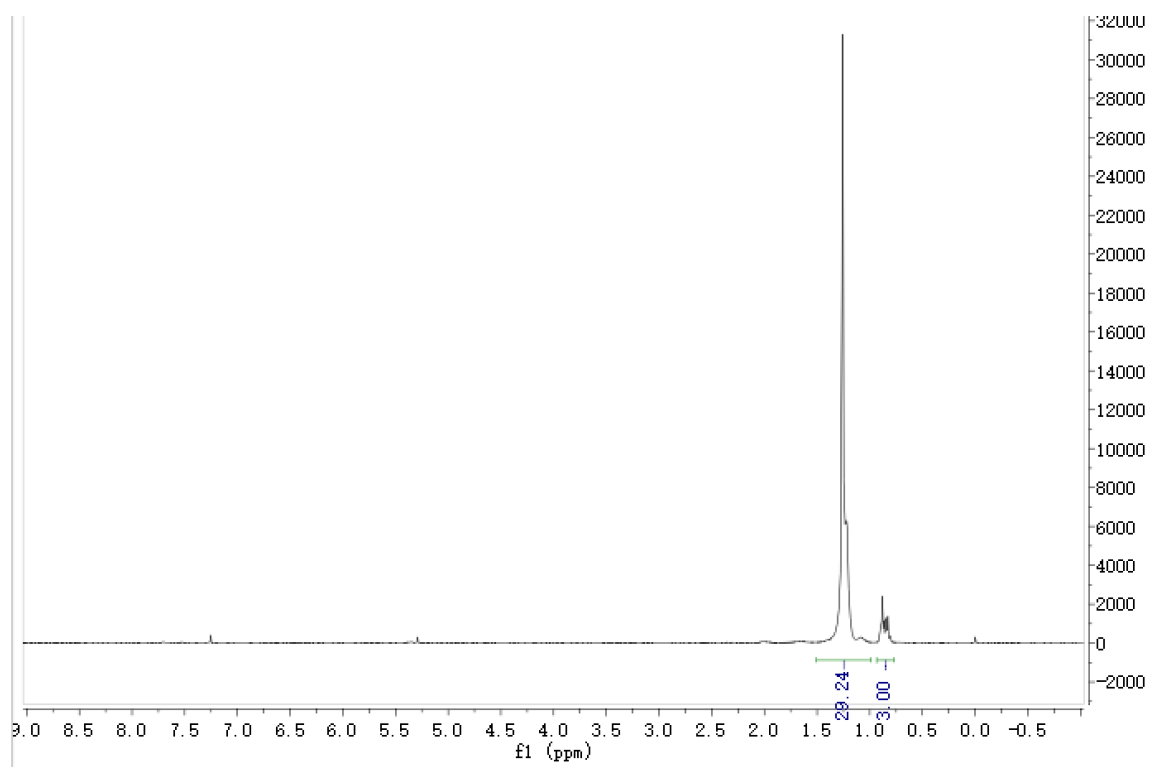

**Figure S20.**  $^1\text{H}$  NMR spectrum (400 MHz,  $\text{CDCl}_3$ , 20  $^\circ\text{C}$ ) of the polymer from table 2, entry 1.

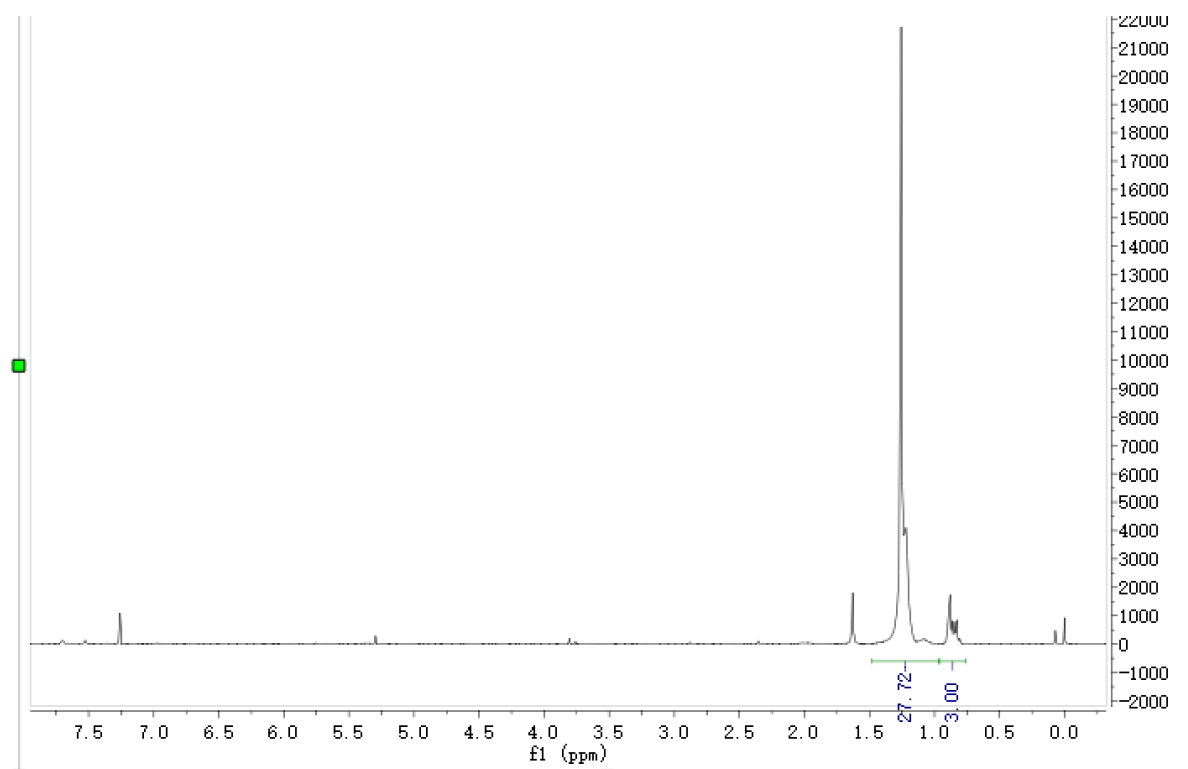

**Figure S21.**  $^1\text{H}$  NMR spectrum (400 MHz,  $\text{CDCl}_3$ , 20  $^\circ\text{C}$ ) of the polymer from table 2, entry 2.

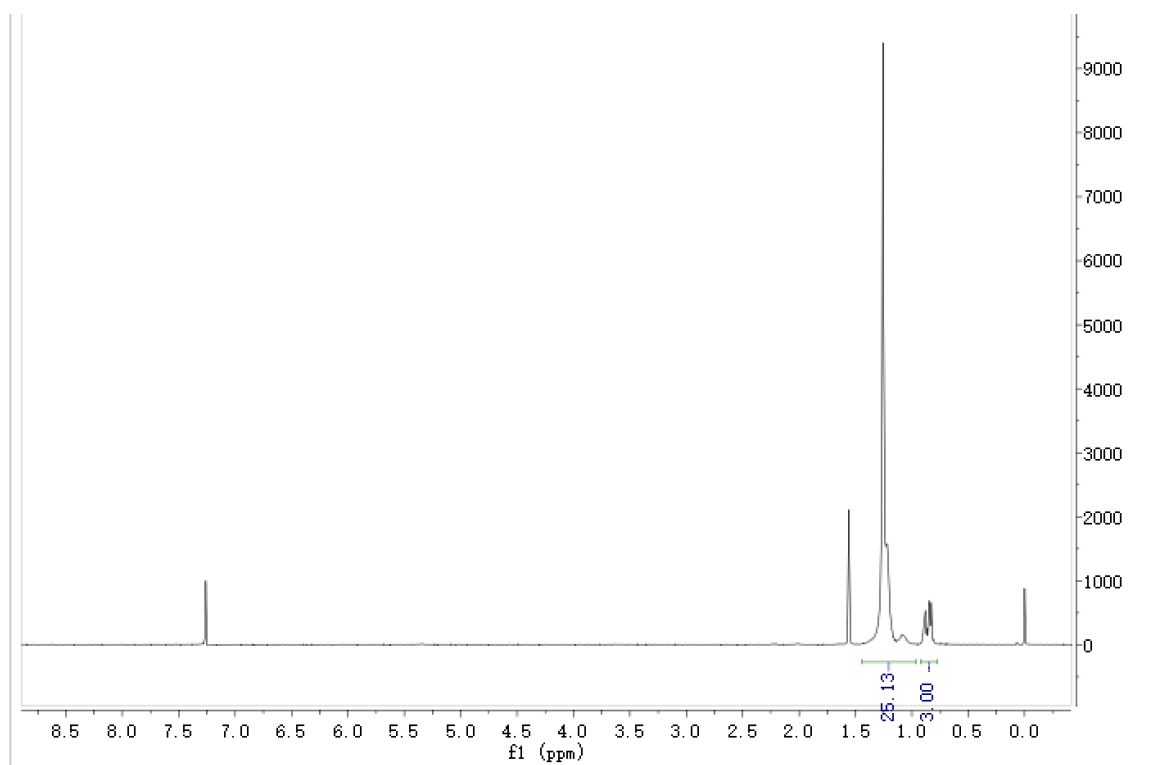

**Figure S22.**  $^1\text{H}$  NMR spectrum (400 MHz,  $\text{CDCl}_3$ , 20  $^\circ\text{C}$ ) of the polymer from table 2, entry 3.

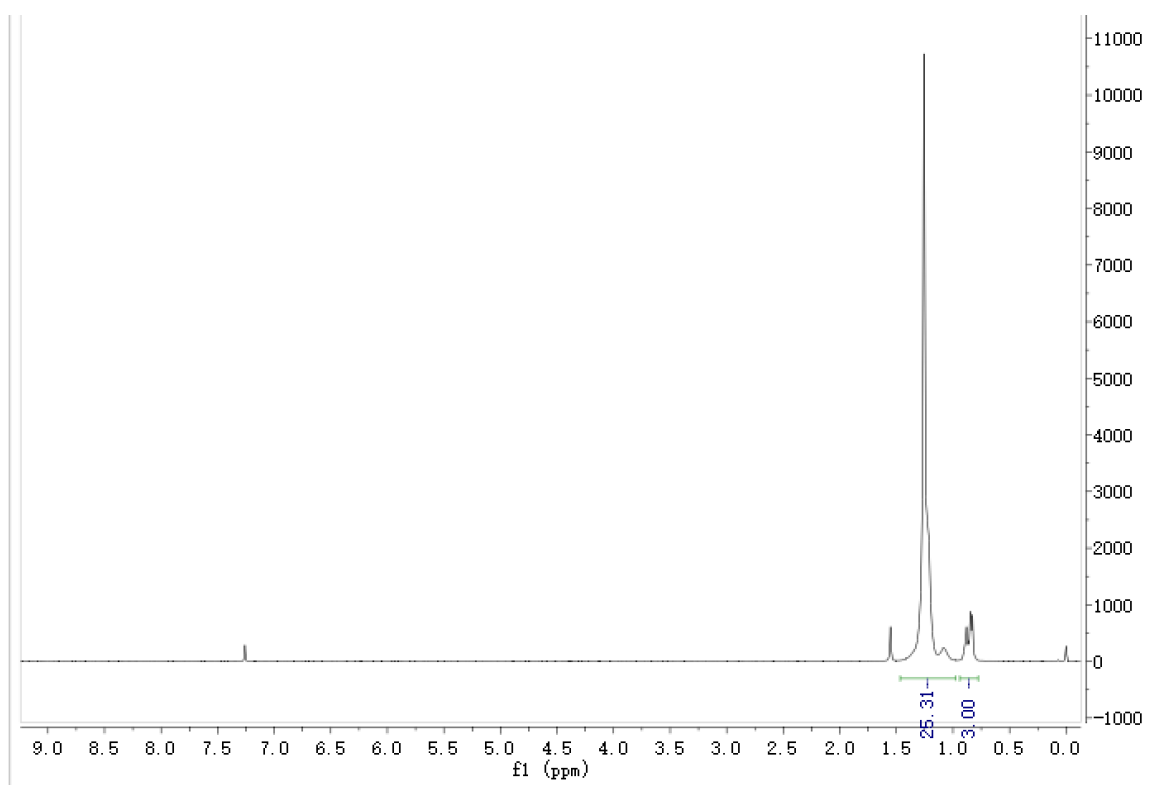

**Figure S23.**  $^1\text{H}$  NMR spectrum (400 MHz,  $\text{CDCl}_3$ , 20  $^\circ\text{C}$ ) of the polymer from table 2, entry 4.

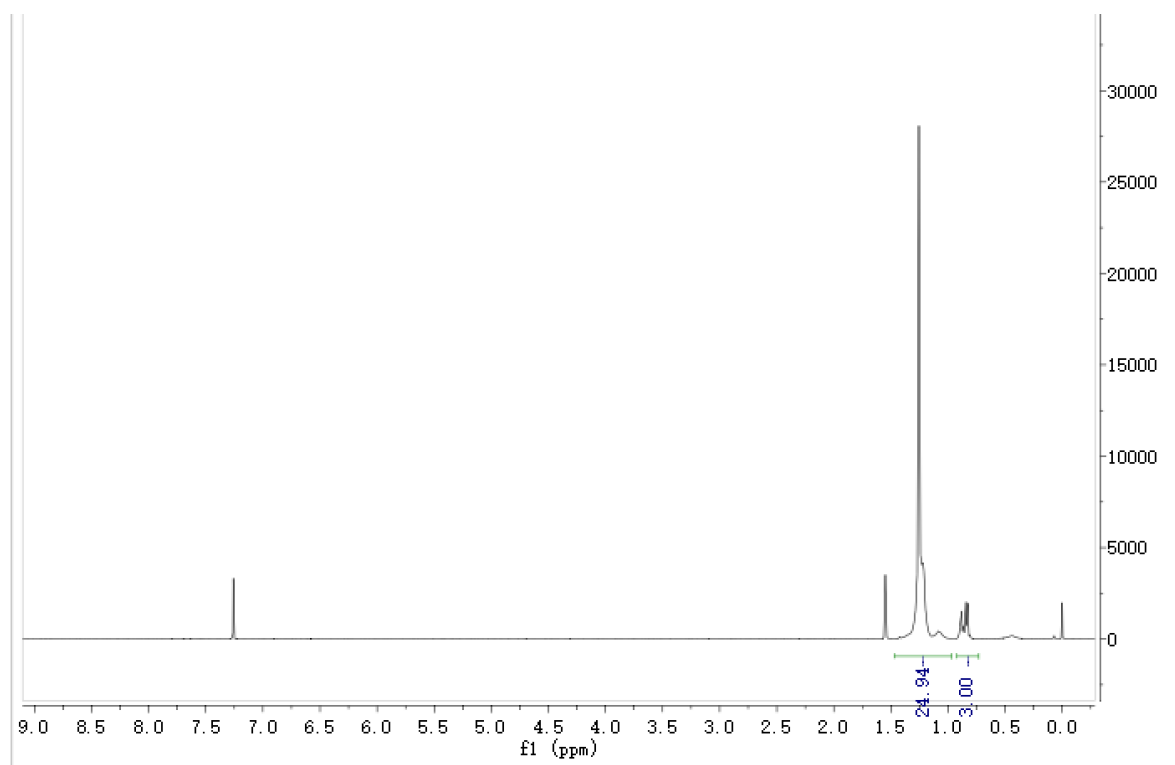

**Figure S24.** <sup>1</sup>H NMR spectrum (400 MHz, CDCl<sub>3</sub>, 20 °C) of the polymer from table 2, entry 5

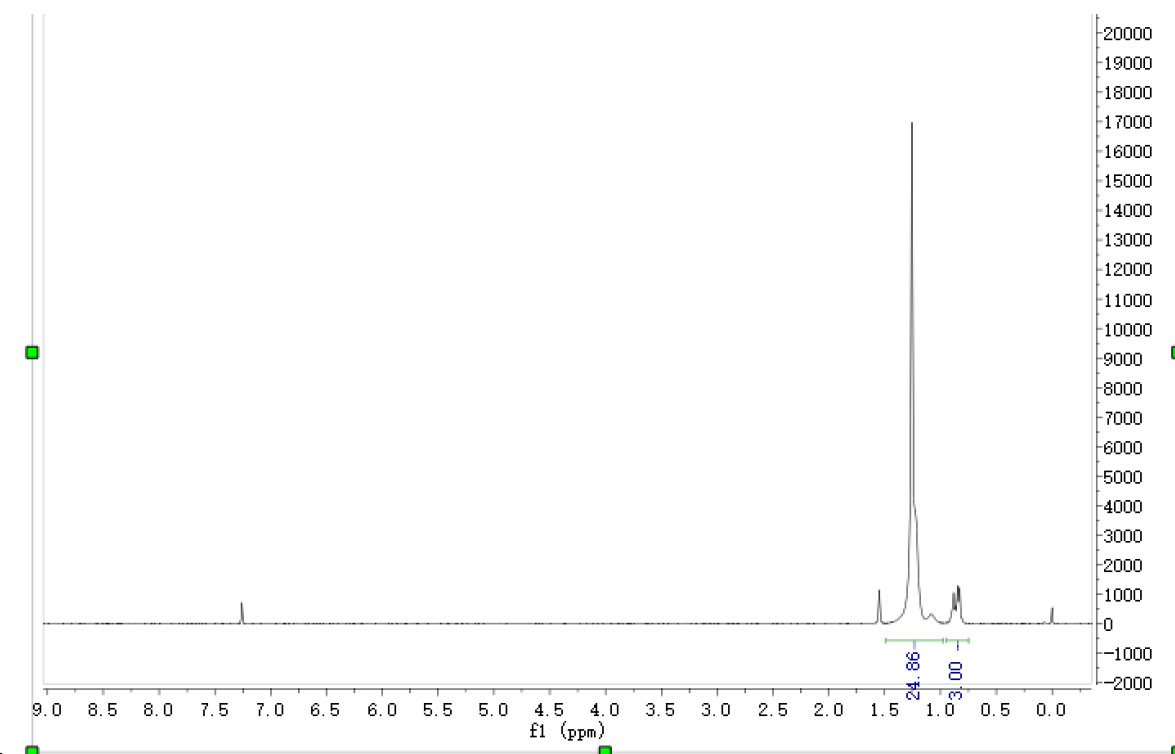

**Figure S25.** <sup>1</sup>H NMR spectrum (400 MHz, CDCl<sub>3</sub>, 20 °C) of the polymer from table 2, entry 6.

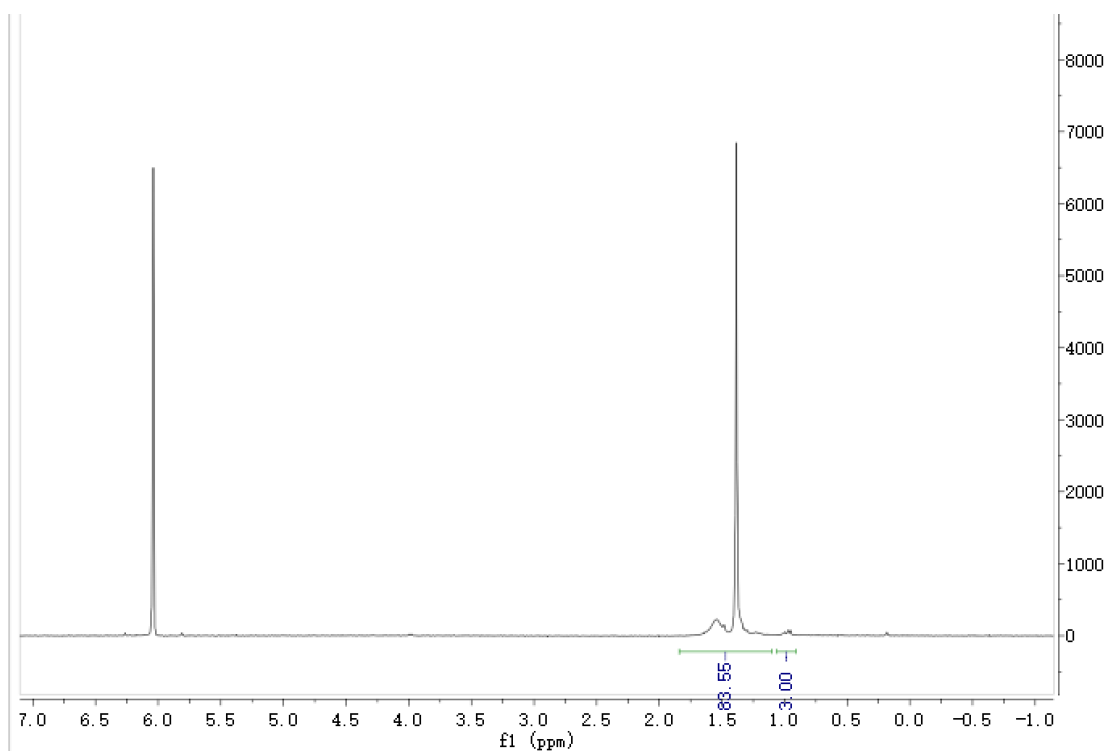

**Figure S26.**  $^1\text{H}$  NMR spectrum (400 MHz,  $\text{C}_2\text{D}_2\text{Cl}_4$ , 120  $^\circ\text{C}$ ) of the polymer from table 2, entry 7.

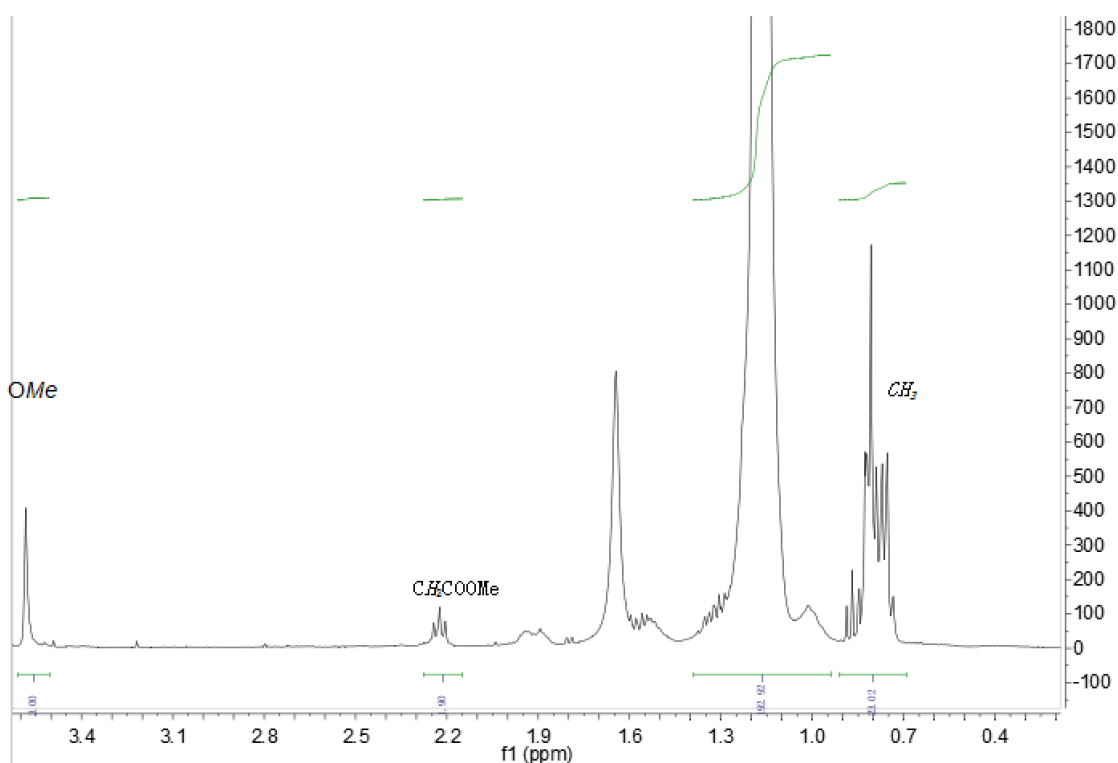

**Figure S27.**  $^1\text{H}$  NMR spectrum (400 MHz,  $\text{CDCl}_3$ , 20  $^\circ\text{C}$ ) of the polymer from table 3, entry 1.

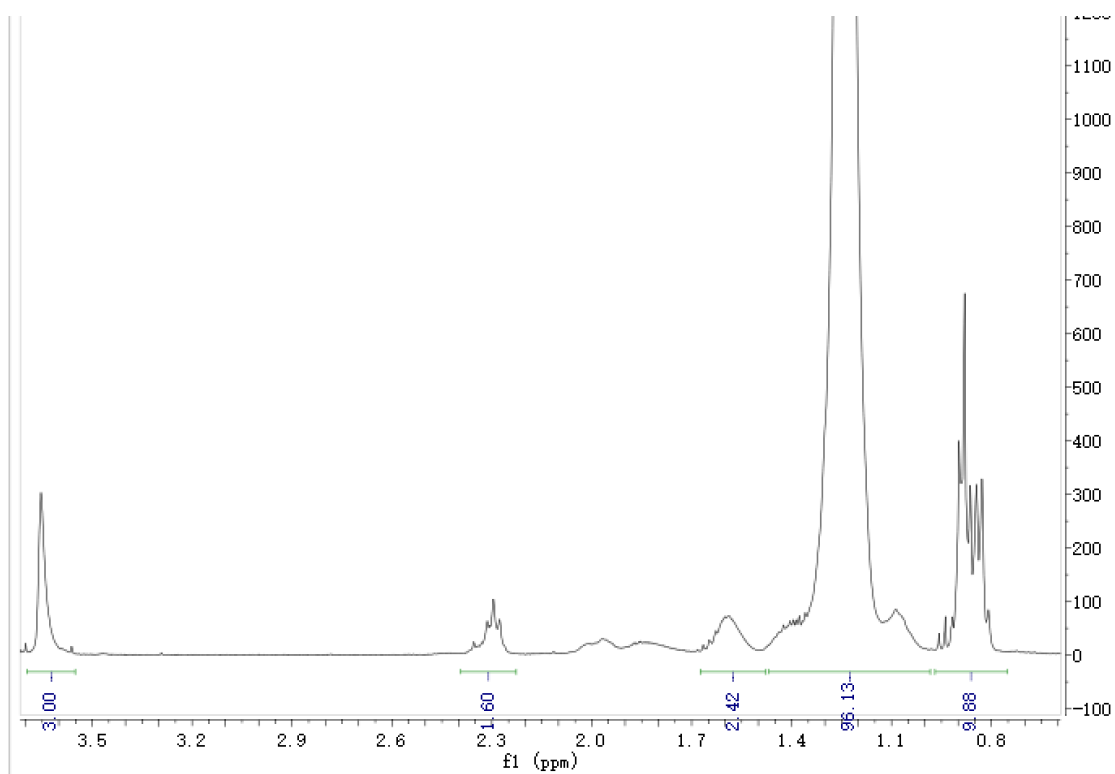

**Figure S28.**  $^1\text{H}$  NMR spectrum (400 MHz,  $\text{CDCl}_3$ , 20  $^\circ\text{C}$ ) of the polymer from table 3, entry 2.

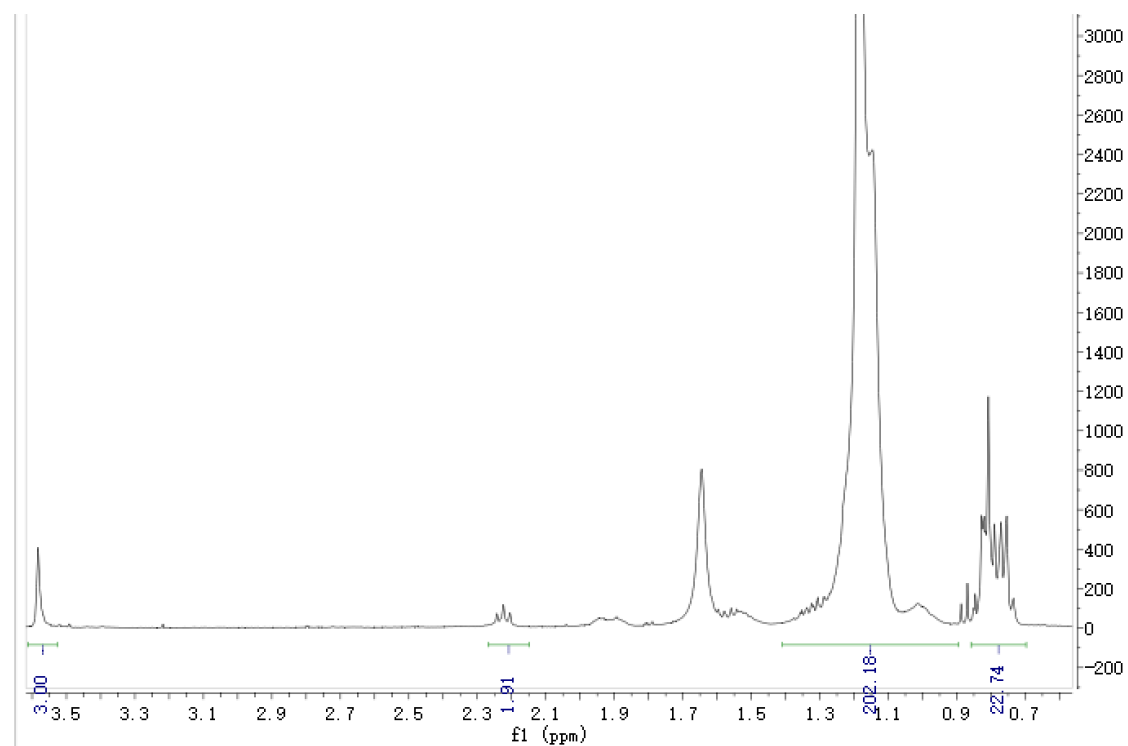

**Figure S29.**  $^1\text{H}$  NMR spectrum (400 MHz,  $\text{CDCl}_3$ , 20  $^\circ\text{C}$ ) of the polymer from table 3, entry 4.

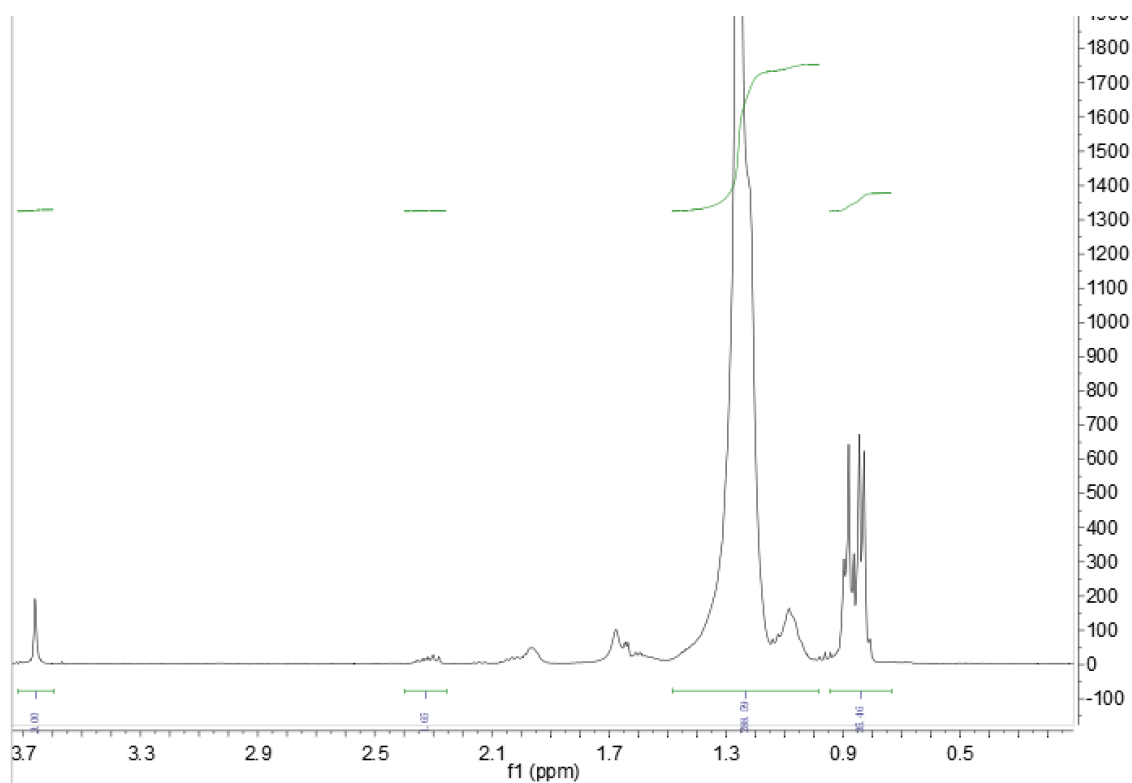

**Figure S30.**  $^1\text{H}$  NMR spectrum (400 MHz,  $\text{CDCl}_3$ , 20  $^\circ\text{C}$ ) of the polymer from table 3, entry 7.

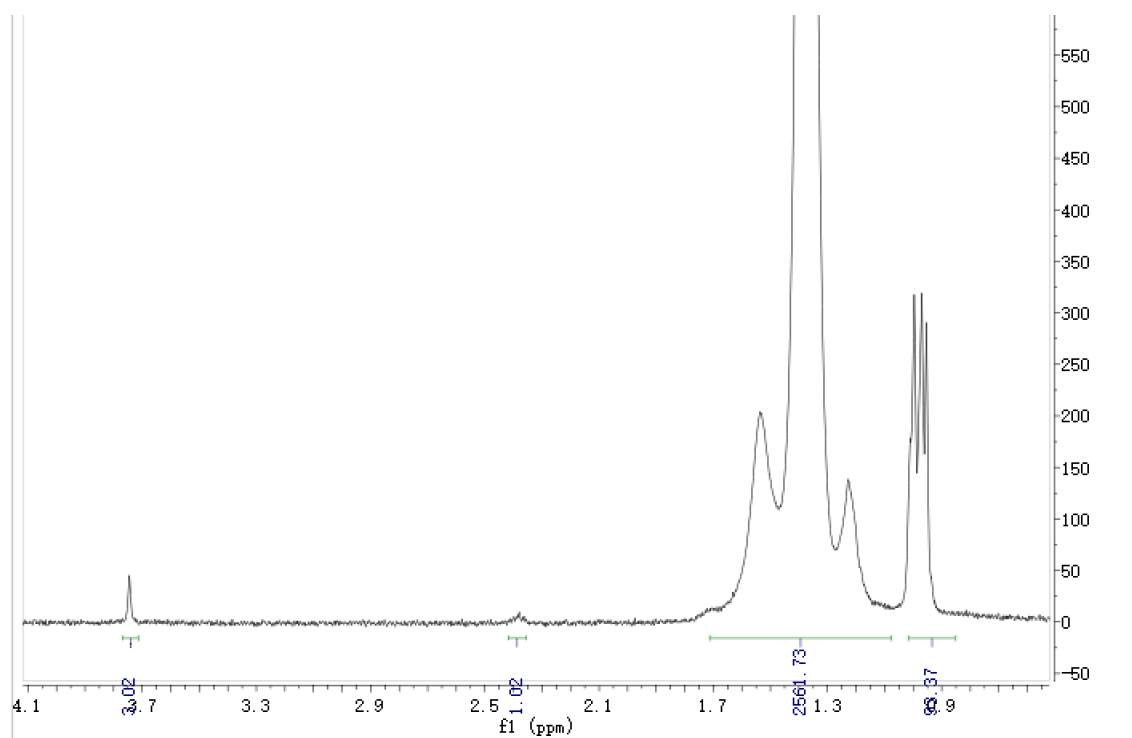

**Figure S31.**  $^1\text{H}$  NMR spectrum (400 MHz,  $\text{C}_2\text{D}_2\text{Cl}_4$ , 120  $^\circ\text{C}$ ) of the polymer from table 3, entry 13.

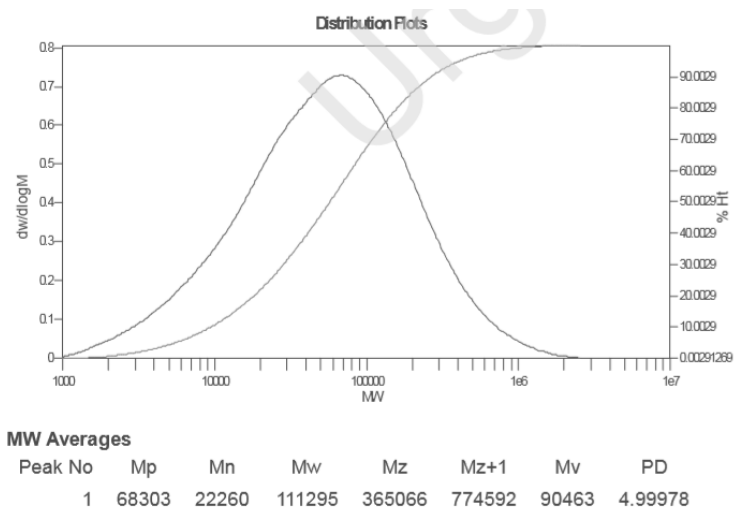

**Figure S32.** GPC trace of the polymer from table 1, entry 2.

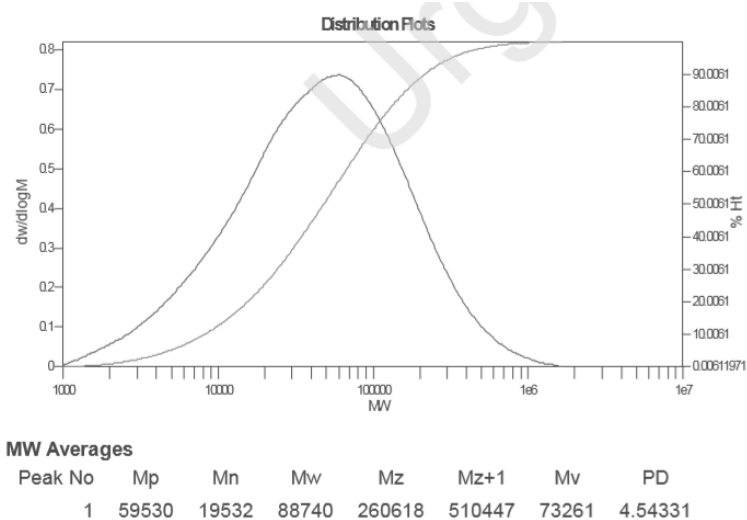

**Figure S33.** GPC trace of the polymer from table 1, entry 3.

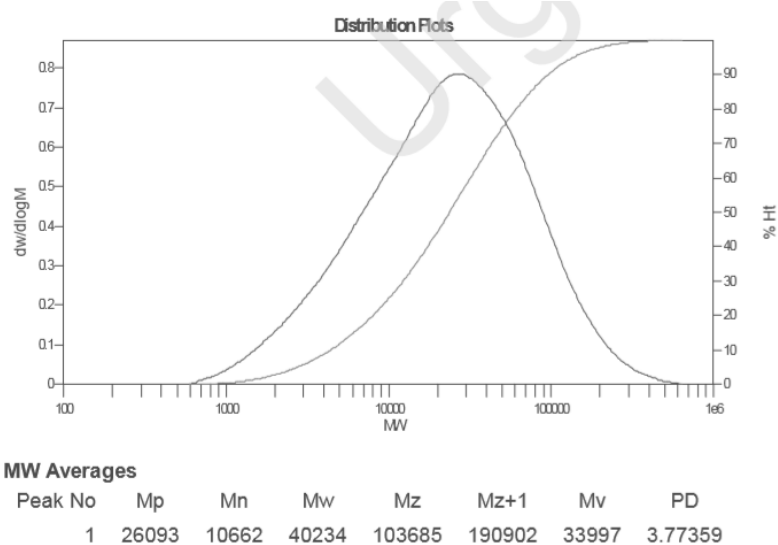

**Figure S34.** GPC trace of the polymer from table 1, entry 4.

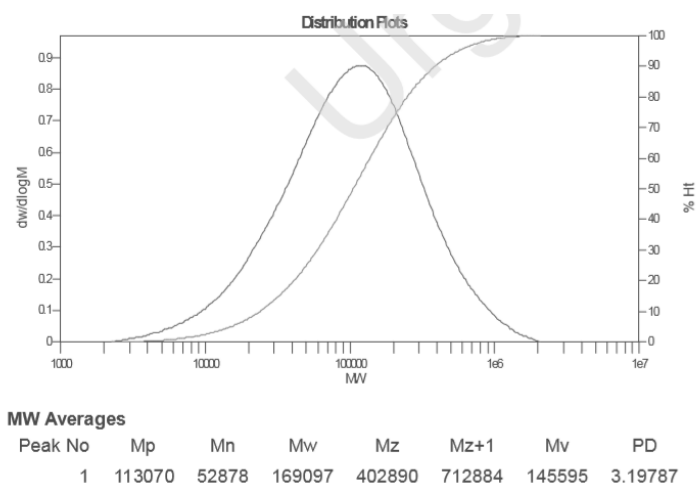

**Figure S35.** GPC trace of the polymer from table 1, entry 5.

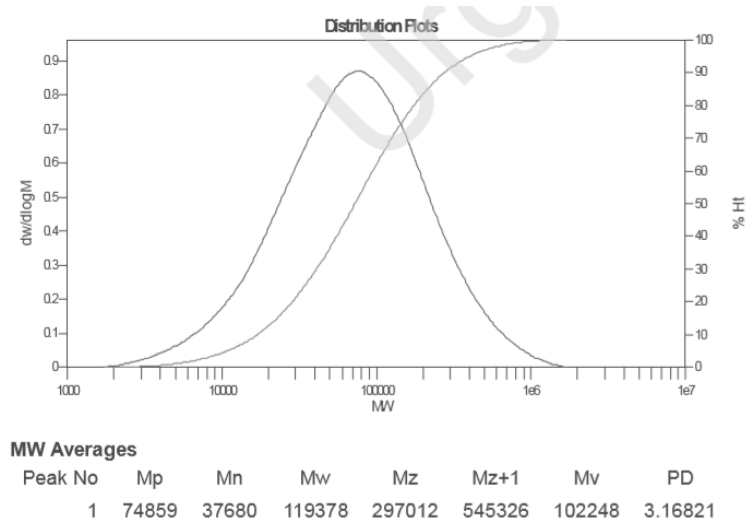

**Figure S36.** GPC trace of the polymer from table 1, entry 6.

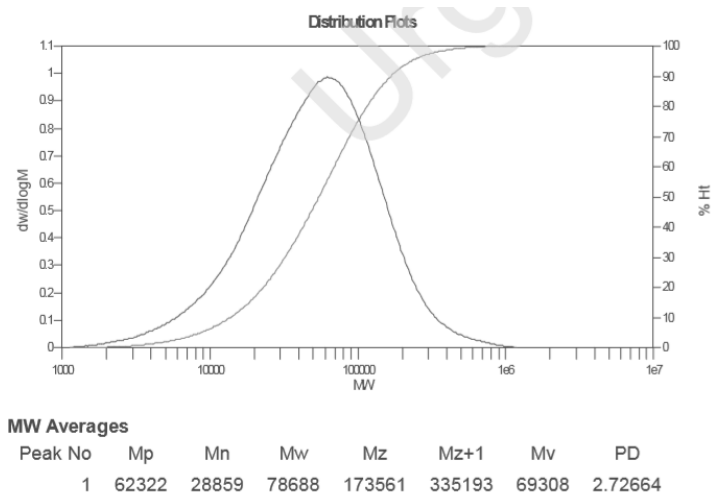

**Figure S37.** GPC trace of the polymer from table 1, entry 7.



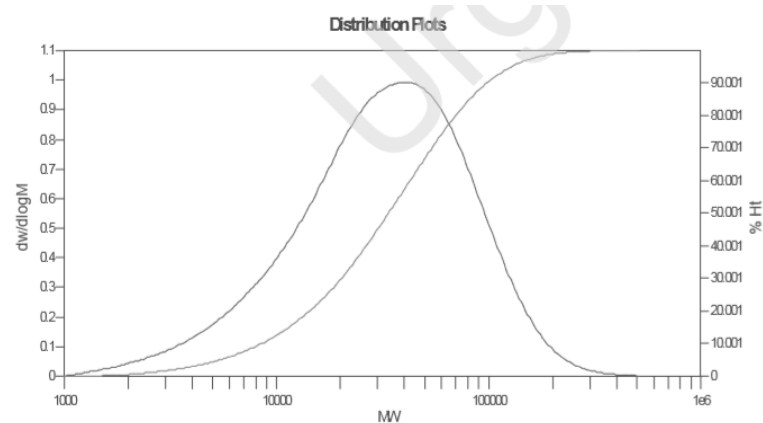

#### MW Averages

| Peak No | Mp    | Mn    | Mw    | Mz    | Mz+1   | Mv    | PD      |
|---------|-------|-------|-------|-------|--------|-------|---------|
| 1       | 41260 | 18175 | 45335 | 84300 | 134278 | 40709 | 2.49436 |

**Figure S38.** GPC trace of the polymer from table 1, entry 8.

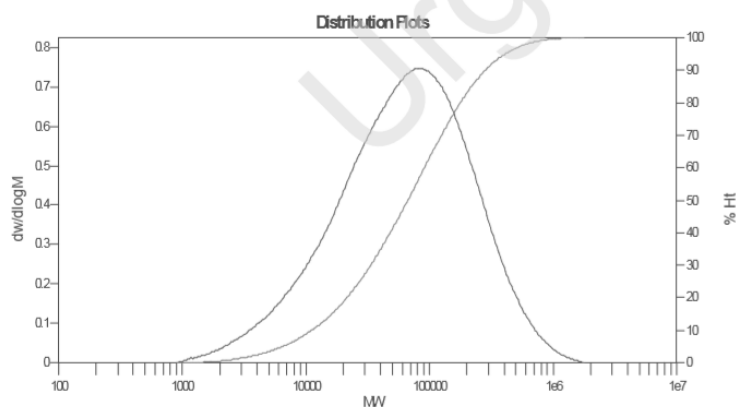

#### MW Averages

| Peak No | Mp    | Mn    | Mw     | Mz     | Mz+1   | Mv    | PD      |
|---------|-------|-------|--------|--------|--------|-------|---------|
| 1       | 79202 | 25492 | 116930 | 311254 | 565003 | 97782 | 4.58693 |

**Figure S39.** GPC trace of the polymer from table 1, entry 11.

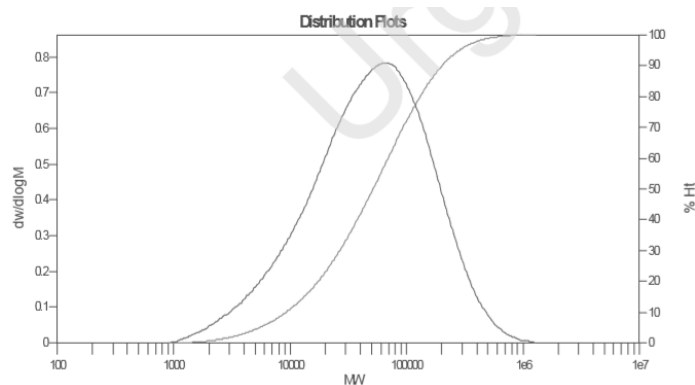

#### MW Averages

| Peak No | Mp    | Mn    | Mw    | Mz     | Mz+1   | Mv    | PD     |
|---------|-------|-------|-------|--------|--------|-------|--------|
| 1       | 67329 | 21446 | 84761 | 208363 | 373663 | 72057 | 3.9523 |

**Figure S40.** GPC trace of the polymer from table 1, entry 12.

**MW Averages**

Mp: 687147

Mn: 376946

Mv: 739855

Mw: 808652

Mz: 1418258

Mz+1: 2079764

PD: 2.1453

**Distribution Plots**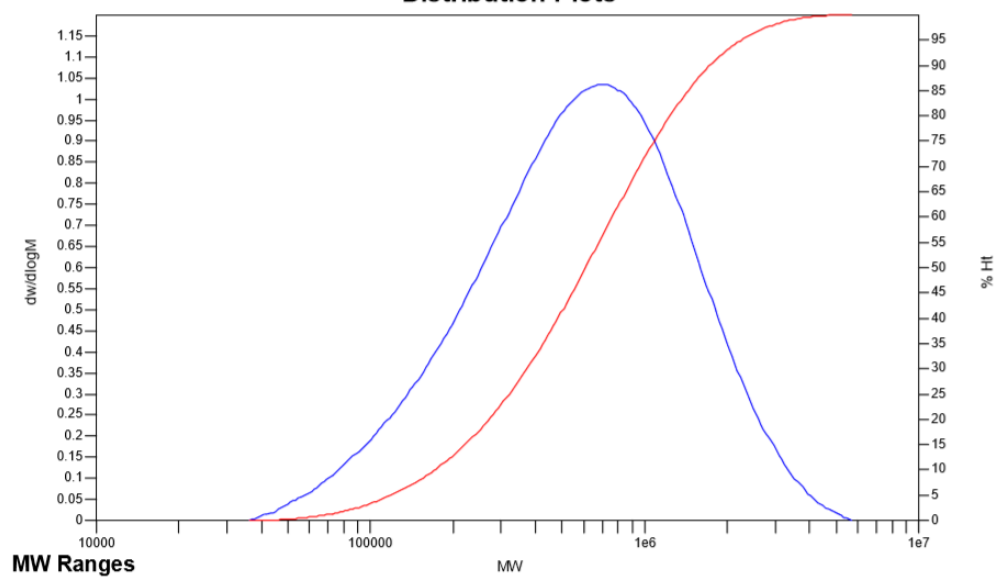

**Figure S41.** GPC trace of the polymer from table 1, entry 13.

**MW Averages**

Mp: 616100

Mn: 330829

Mv: 649727

Mw: 709099

Mz: 1225327

Mz+1: 1766562

PD: 2.1434

**Distribution Plots**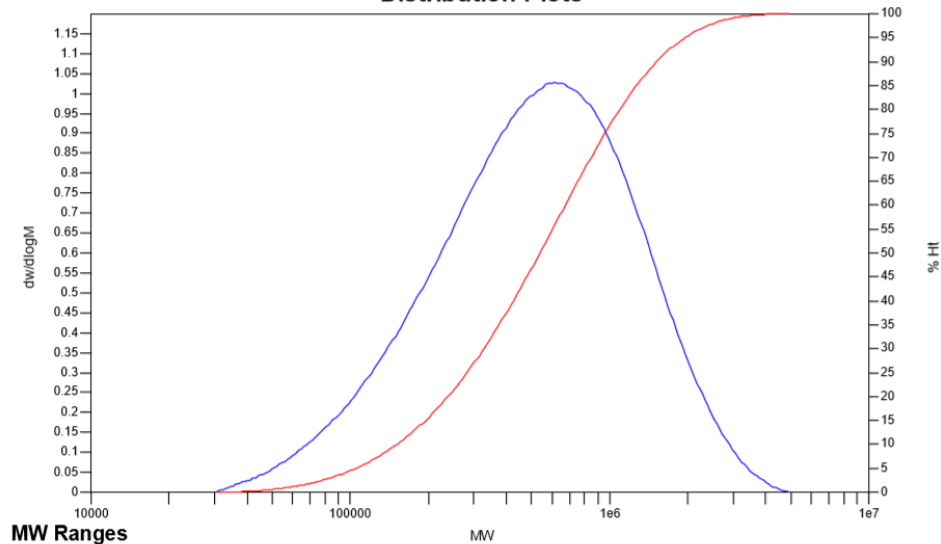

**Figure S42.** GPC trace of the polymer from table 1, entry 14.

**MW Averages**

Mp: 177547

Mn: 104650

Mv: 221818

Mw: 246221

Mz: 480766

Mz+1: 758797

PD: 2.3528

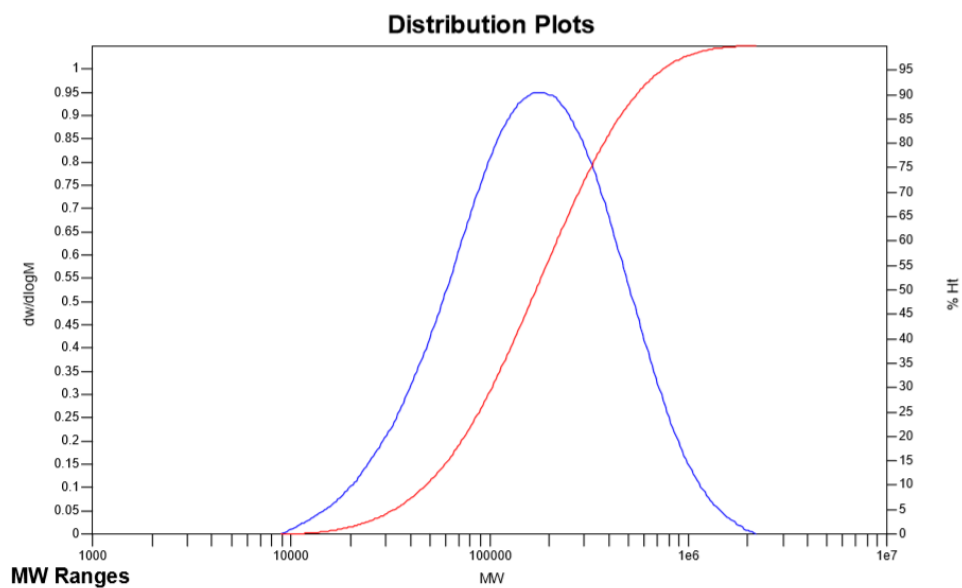

**Figure S43.** GPC trace of the polymer from table 1, entry 15.

**MW Averages**

Mp: 144325

Mn: 86333

Mv: 176753

Mw: 197321

Mz: 377572

Mz+1: 598615

PD: 2.2856

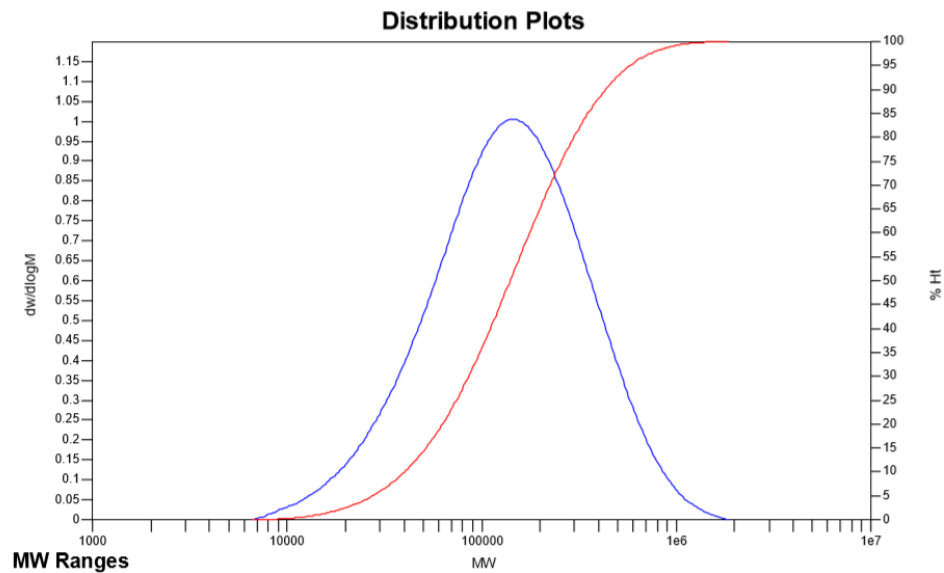

**Figure S44.** GPC trace of the polymer from table 1, entry 16.

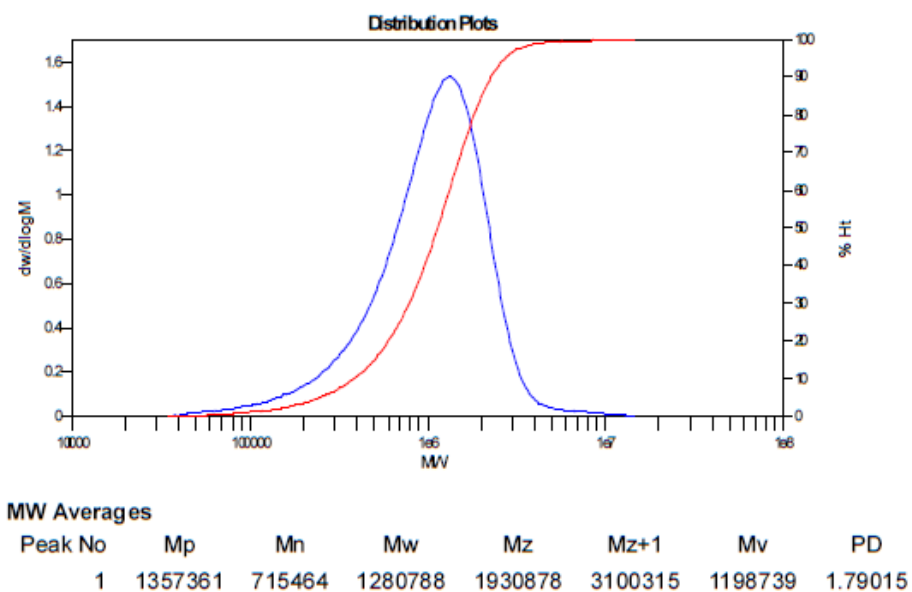

**Figure S45.** GPC trace of the polymer from table 1, entry 17.

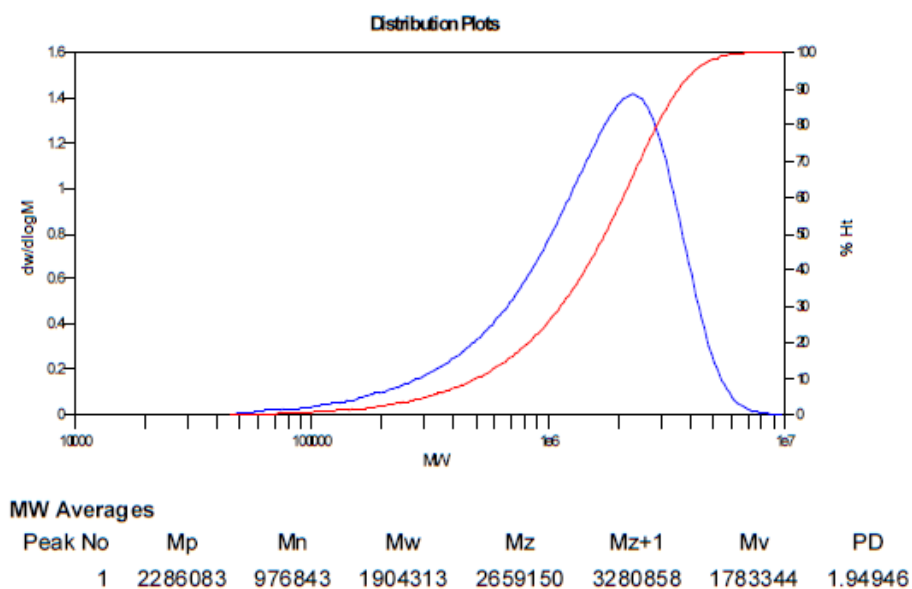

**Figure S46.** GPC trace of the polymer from table 1, entry 18.

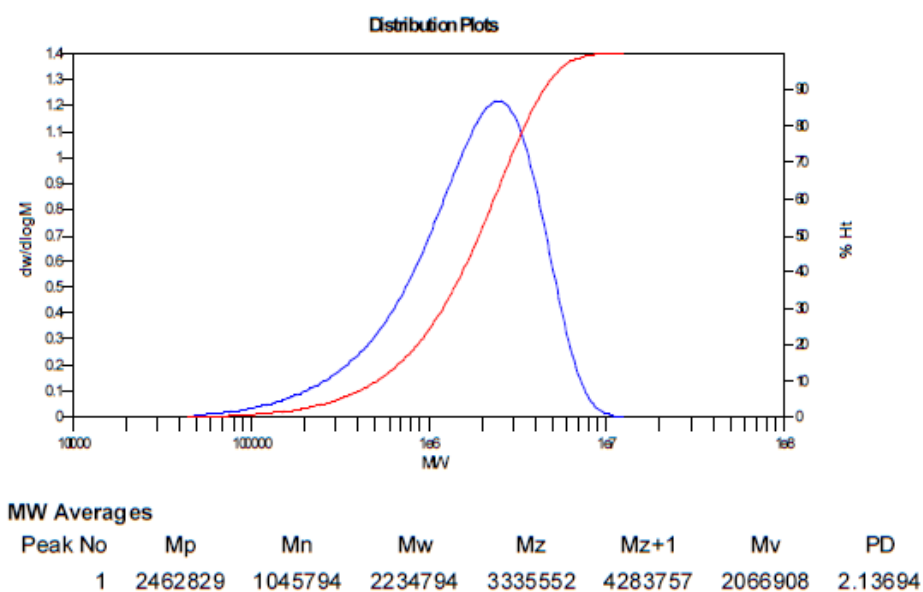

**Figure S47.** GPC trace of the polymer from table 1, entry 19.

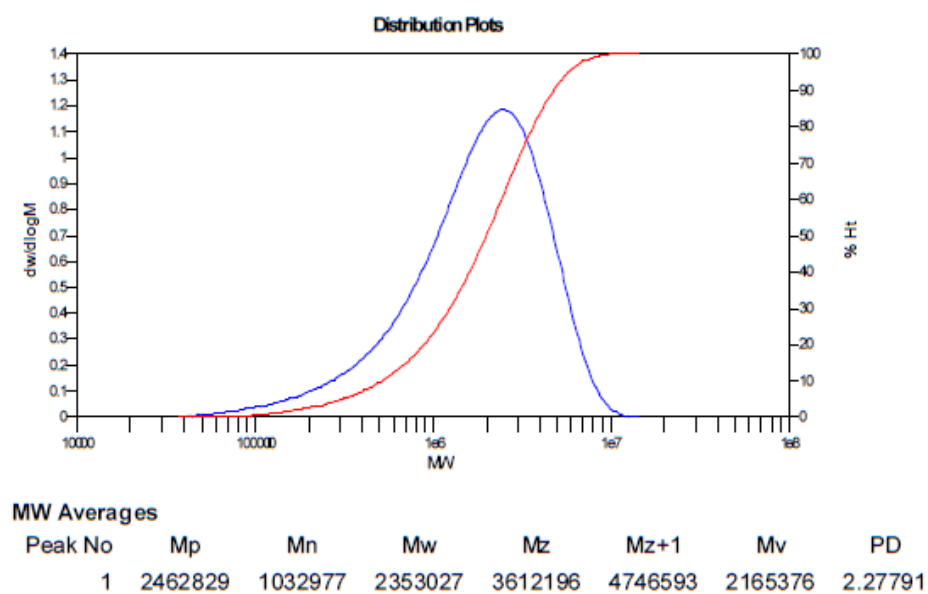

**Figure S48.** GPC trace of the polymer from table 1, entry 20.

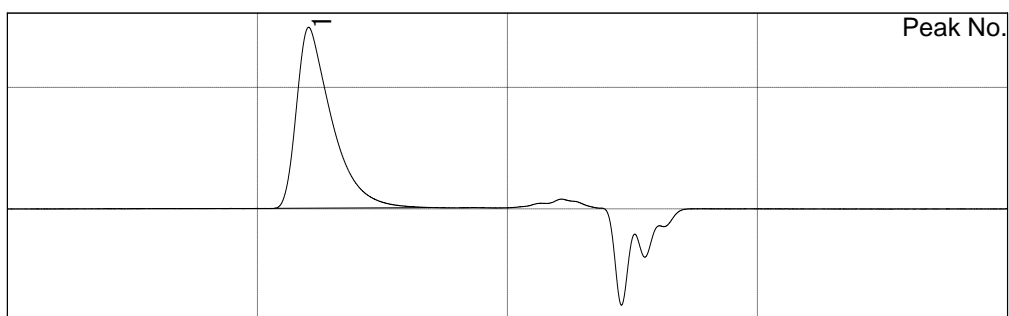

#### Result of molecular weight calculation (RI)

Peak 1 Base Peak

|               | [min] | [mV]   | [mol]        | Mn      | 395,852 |
|---------------|-------|--------|--------------|---------|---------|
| Peak start    | 5.348 | 0.217  | 1,785,831    | Mw      | 570,210 |
| Peak top      | 6.018 | 74.868 | 680,026      | Mz      | 698,842 |
| Peak end      | 8.455 | 0.513  | 20,302       | Mz+1    | 800,983 |
|               |       |        |              | Mv      | 570,210 |
| Height [mV]   |       |        | 74.587       | Mp      | 680,026 |
| Area [mV*sec] |       |        | 3638.775     | Mz/Mw   | 1.226   |
| Area% [%]     |       |        | 100.000      | Mw/Mn   | 1.440   |
| [eta]         |       |        | 570209.70717 | Mz+1/Mw | 1.405   |

**Figure S49.** GPC trace of the polymer from table 2, entry 3.

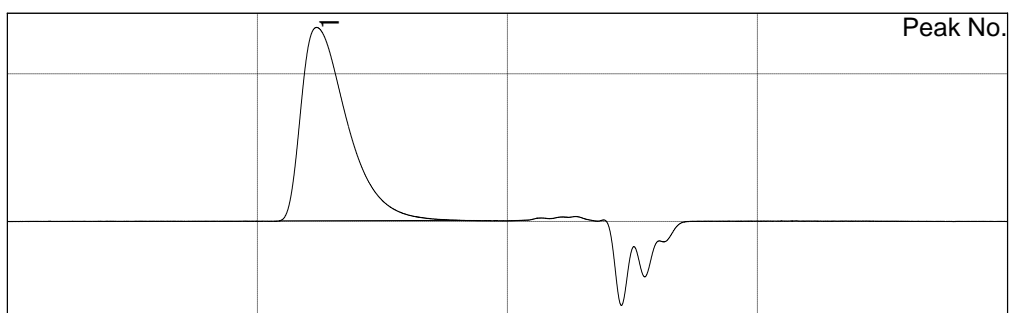

#### Result of molecular weight calculation (RI)

Peak 1 Base Peak

|               | [min] | [mV]   | [mol]        | Mn      | 261,466 |
|---------------|-------|--------|--------------|---------|---------|
| Peak start    | 5.430 | 0.262  | 1,587,559    | Mw      | 441,884 |
| Peak top      | 6.177 | 65.727 | 541,294      | Mz      | 581,570 |
| Peak end      | 9.037 | 0.395  | 8,780        | Mz+1    | 690,459 |
|               |       |        |              | Mv      | 441,884 |
| Height [mV]   |       |        | 65.437       | Mp      | 541,295 |
| Area [mV*sec] |       |        | 4186.401     | Mz/Mw   | 1.316   |
| Area% [%]     |       |        | 100.000      | Mw/Mn   | 1.690   |
| [eta]         |       |        | 441883.72025 | Mz+1/Mw | 1.563   |

**Figure S50.** GPC trace of the polymer from table 2, entry 4.

Figure S51

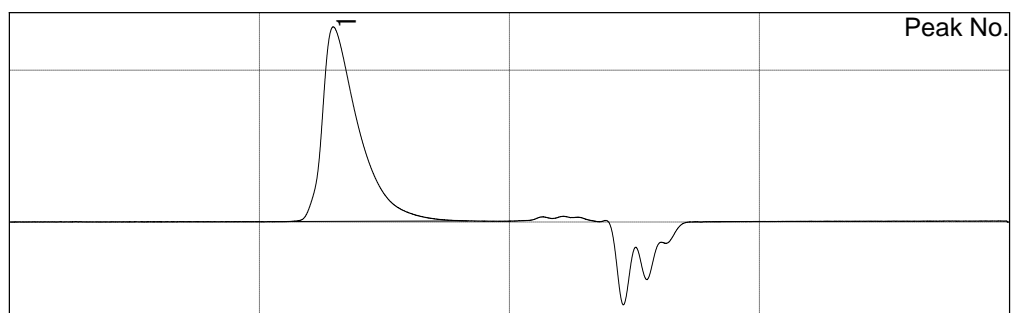

# Result of molecular weight calculation (RI)

Peak 1 Base Peak

|               | [min] | [mV]   | [mol]        | Mn      | 182,379 |
|---------------|-------|--------|--------------|---------|---------|
| Peak start    | 5.652 | 0.224  | 1,153,457    | Mw      | 280,513 |
| Peak top      | 6.472 | 64.344 | 353,842      | Mz      | 351,315 |
| Peak end      | 9.137 | 0.384  | 7,602        | Mz+1    | 408,976 |
|               |       |        |              | Mv      | 280,513 |
| Height [mV]   |       | 64.082 |              | Mp      | 353,843 |
| Area [mV*sec] |       |        | 3224.836     | Mz/Mw   | 1.252   |
| Area% [%]     |       |        | 100.000      | Mw/Mn   | 1.538   |
| [eta]         |       |        | 280513.16636 | Mz+1/Mw | 1.458   |

**Figure S51.** GPC trace of the polymer from table 2, entry 5.

Figure S52

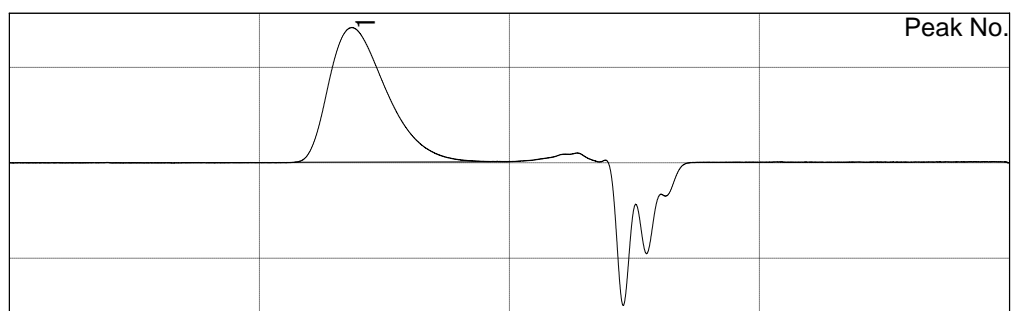

# Result of molecular weight calculation (RI)

Peak 1 Base Peak

|               | [min] | [mV]   | [mol]        | Mn      | 98,672  |
|---------------|-------|--------|--------------|---------|---------|
| Peak start    | 5.707 | 0.115  | 1,065,565    | Mw      | 197,392 |
| Peak top      | 6.852 | 28.401 | 204,639      | Mz      | 294,797 |
| Peak end      | 9.958 | 0.206  | 2,326        | Mz+1    | 382,809 |
|               |       |        |              | Mv      | 197,392 |
| Height [mV]   |       | 28.261 |              | Mp      | 204,640 |
| Area [mV*sec] |       |        | 2258.530     | Mz/Mw   | 1.493   |
| Area% [%]     |       |        | 100.000      | Mw/Mn   | 2.001   |
| [eta]         |       |        | 197392.45047 | Mz+1/Mw | 1.939   |

**Figure S52.** GPC trace of the polymer from table 2, entry 6.

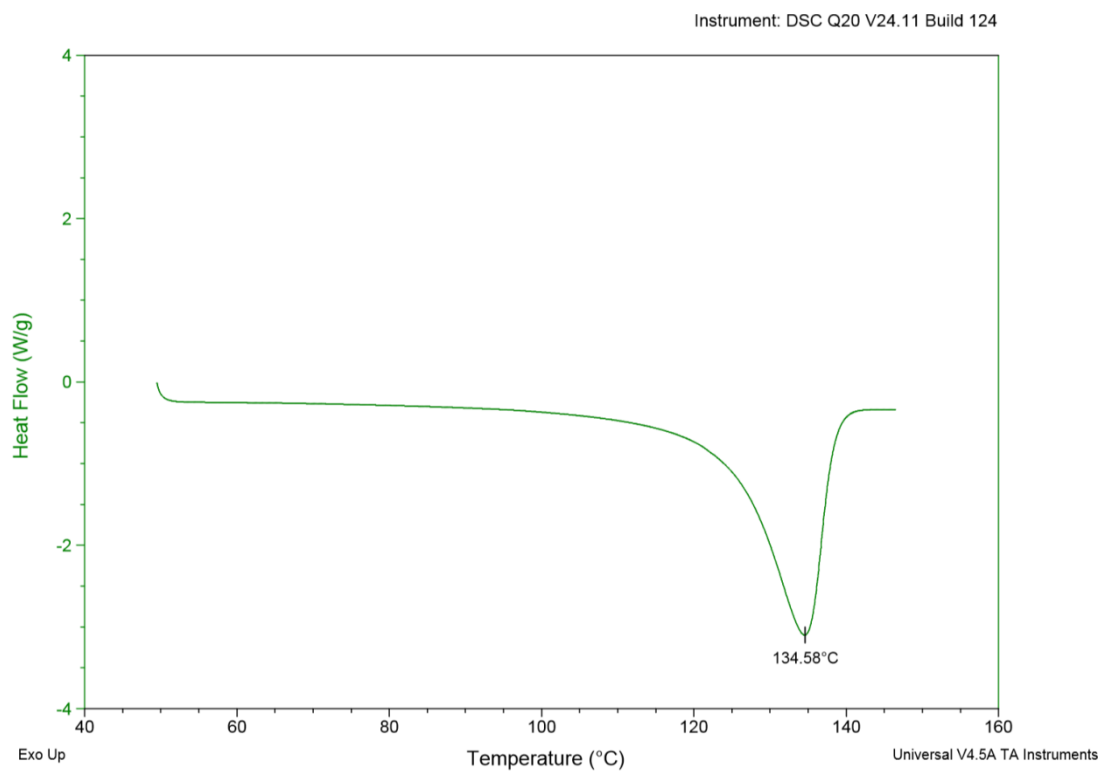

**Figure S53.** DSC data of the polymer from table 1, entry 1.

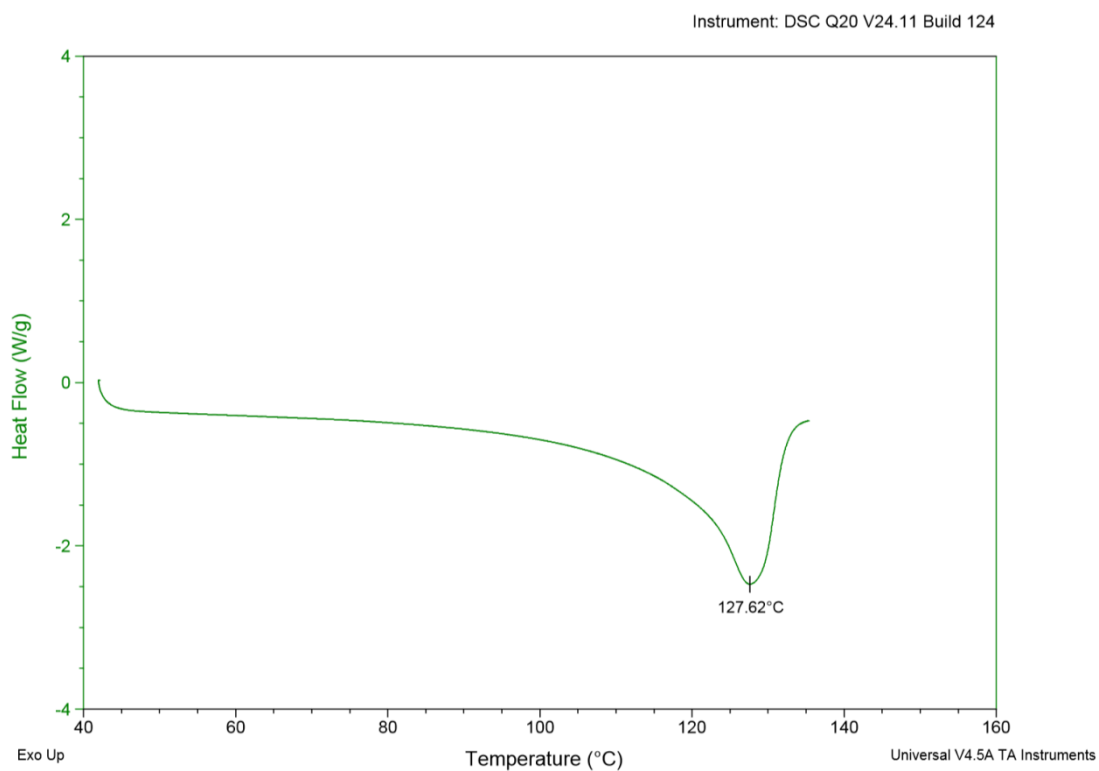

**Figure S54.** DSC data of the polymer from table 1, entry 2.



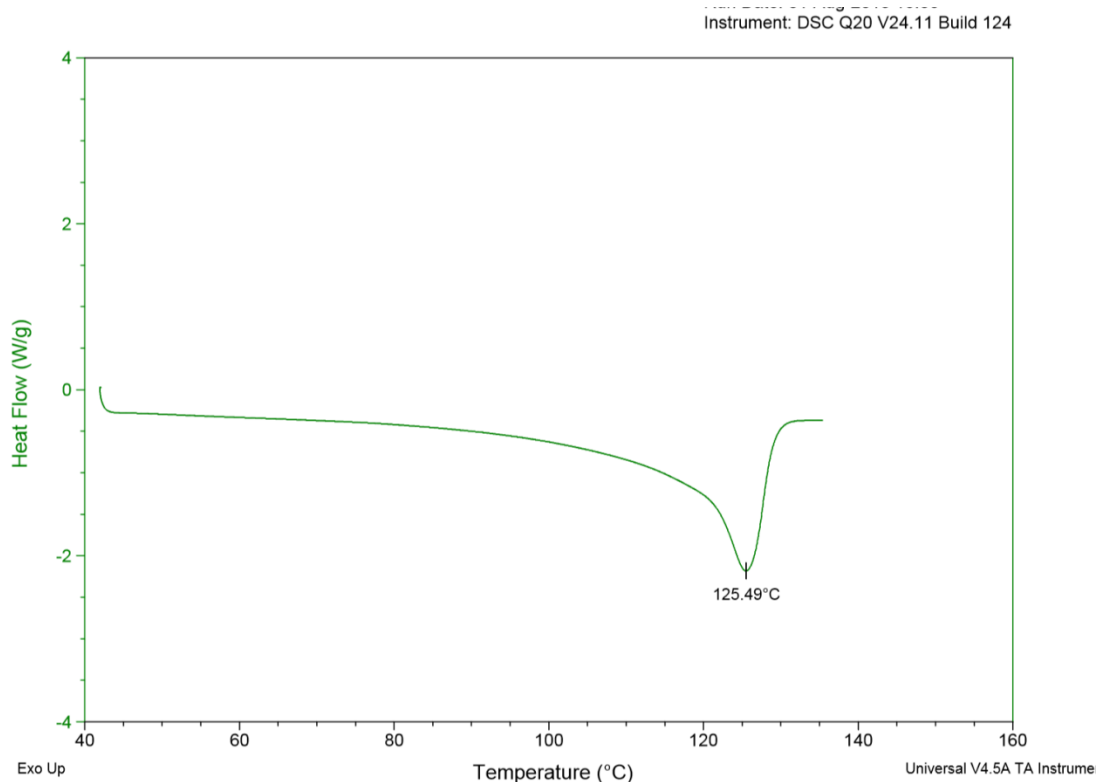

**Figure S55.** DSC data of the polymer from table 1, entry 3.

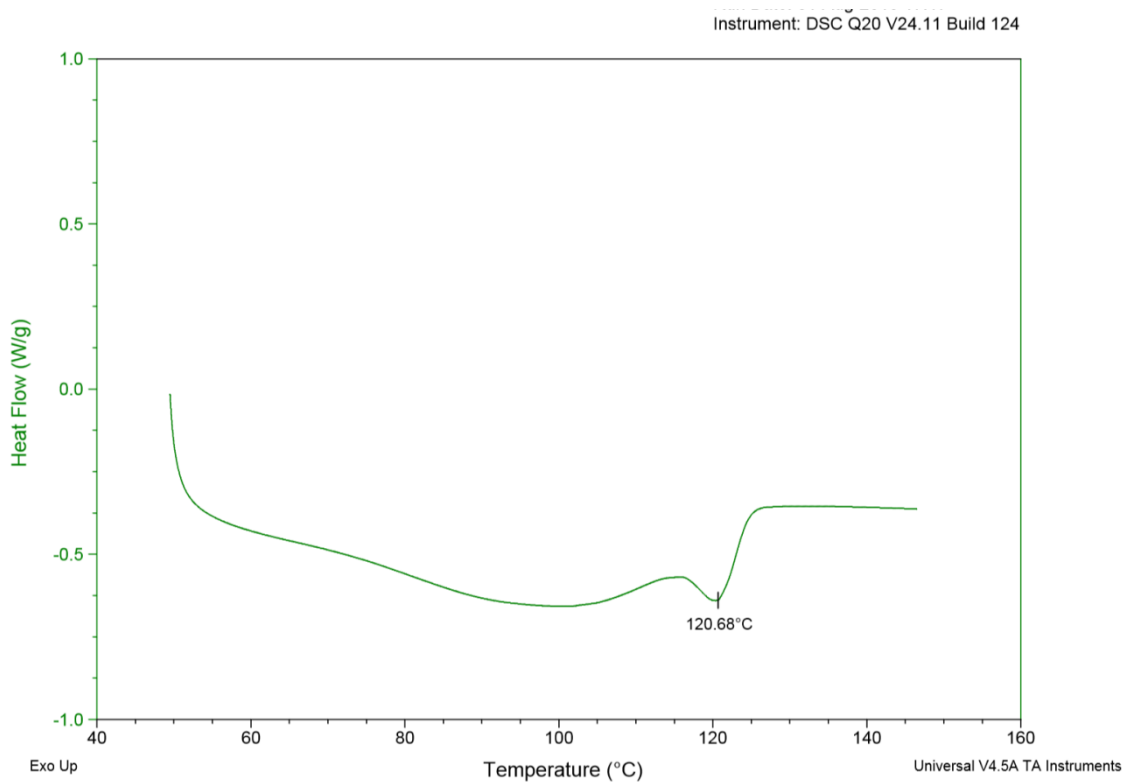

**Figure S56.** DSC data of the polymer from table 1, entry 4.

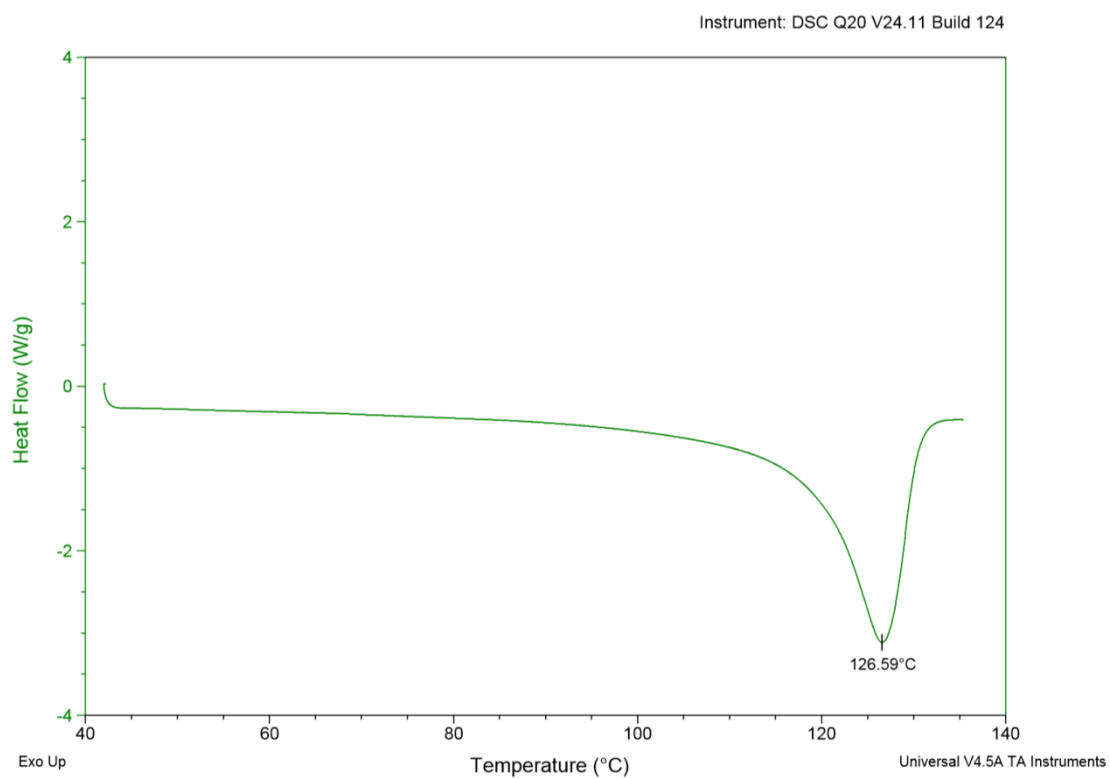

**Figure S57.** DSC data of the polymer from table 1, entry 6.

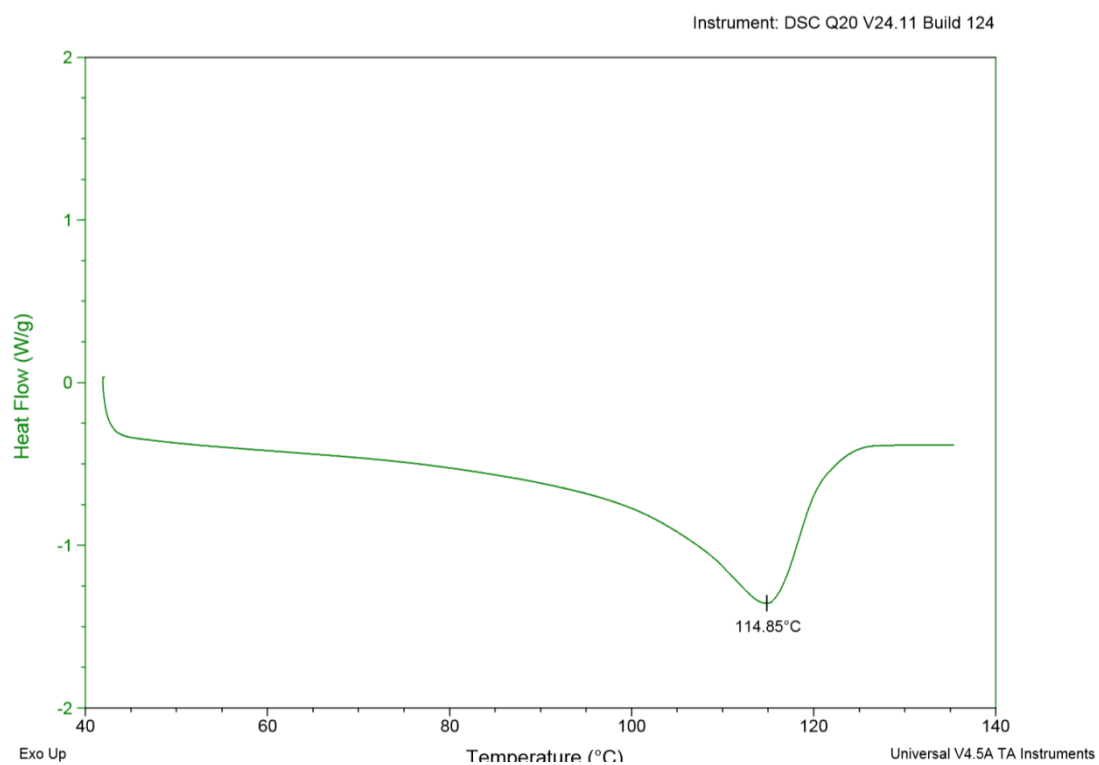

**Figure S58.** DSC data of the polymer from table 1, entry 7.

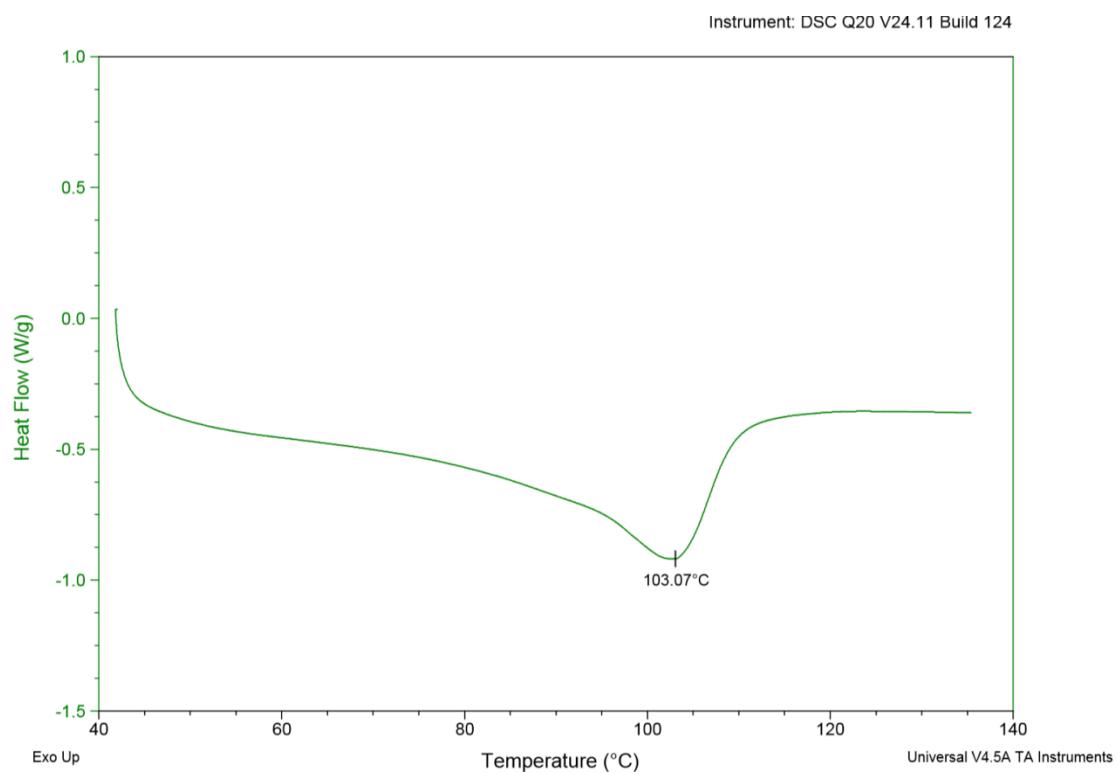

**Figure S59.** DSC data of the polymer from table 1, entry 8.

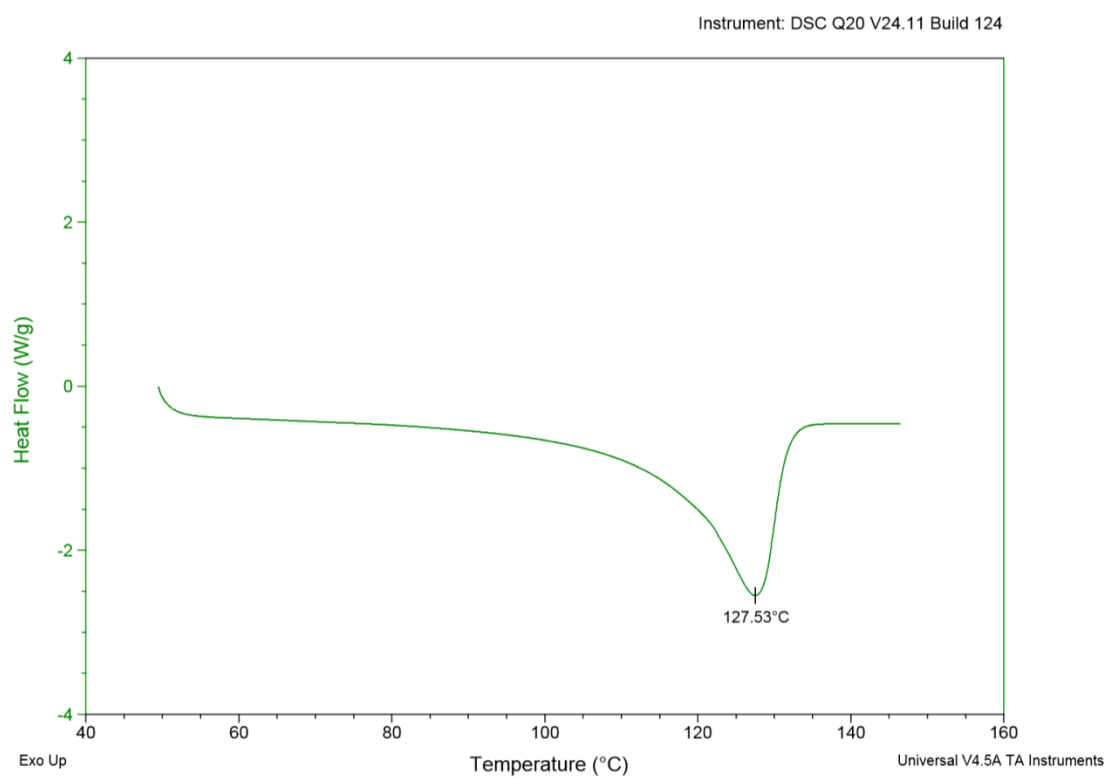

**Figure S60.** DSC data of the polymer from table 1, entry 9.

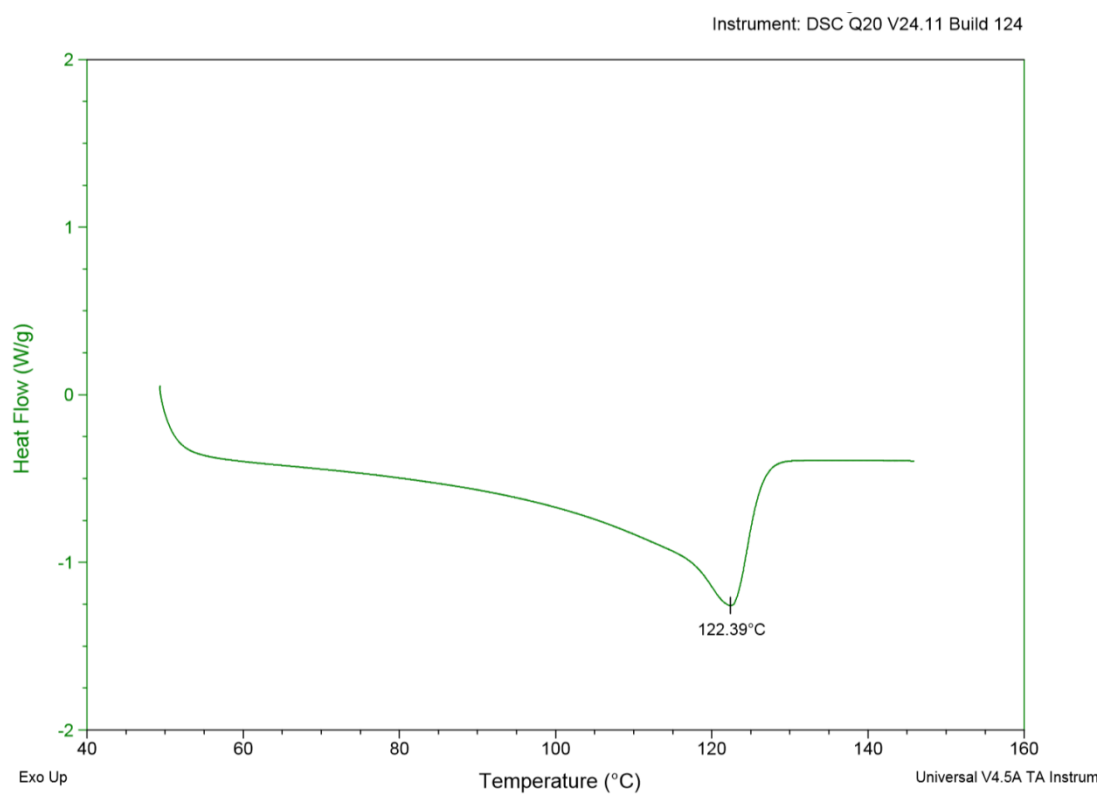

**Figure S61.** DSC data of the polymer from table 1, entry 10.

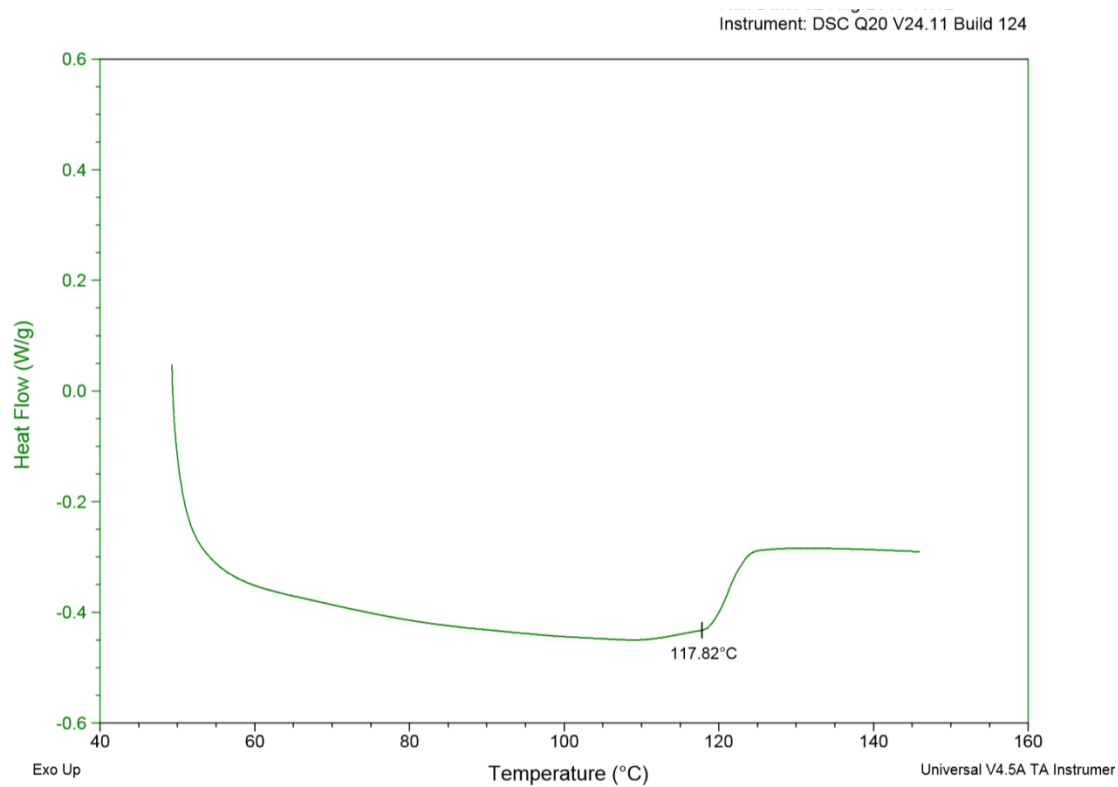

**Figure S62.** DSC data of the polymer from table 1, entry 11.

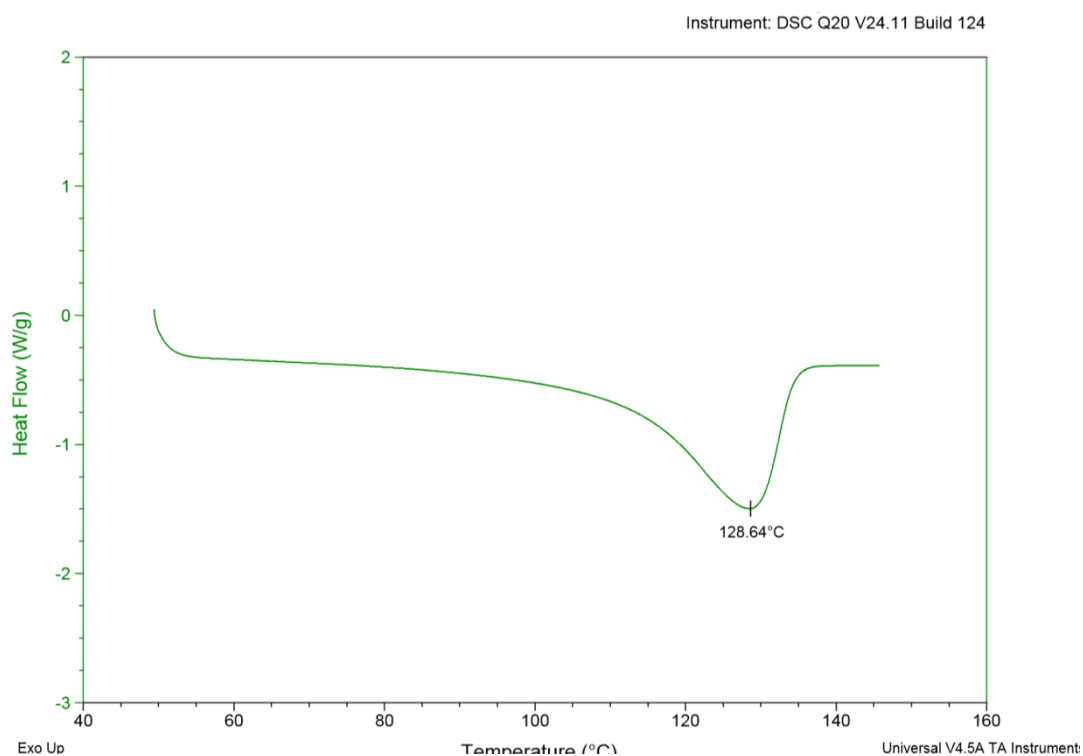

**Figure S63.** DSC data of the polymer from table 1, entry 13.

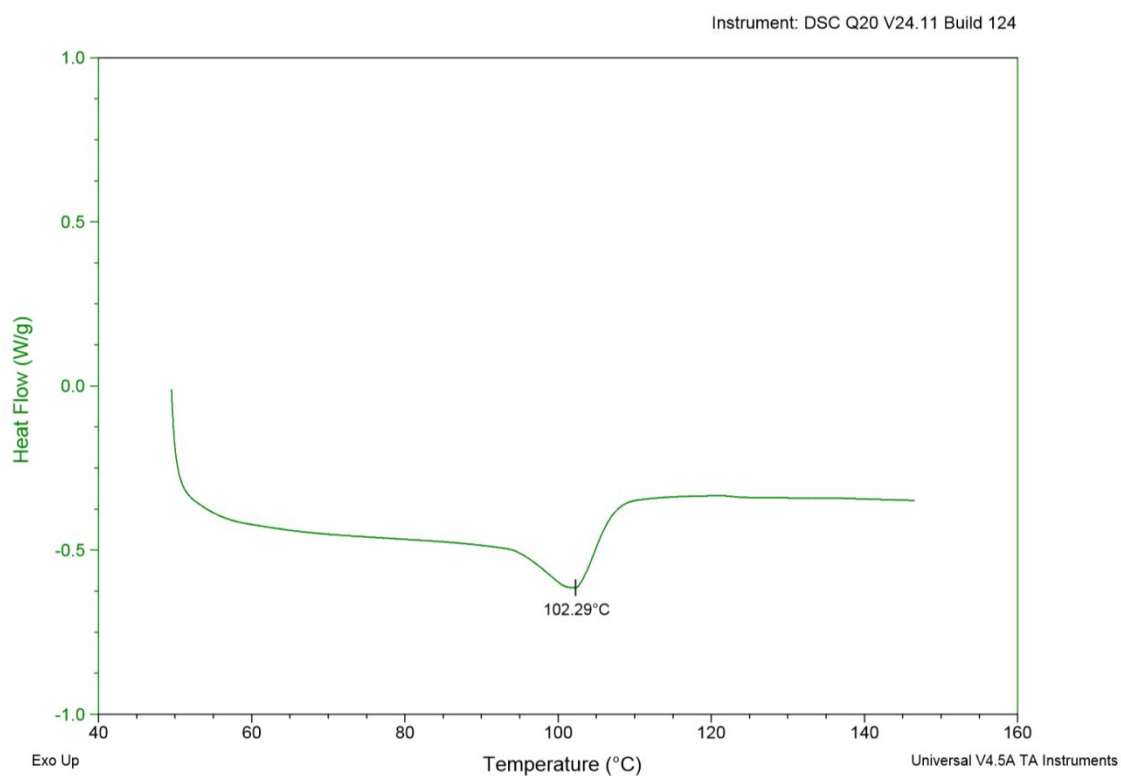

**Figure S64.** DSC data of the polymer from table 1, entry 15.

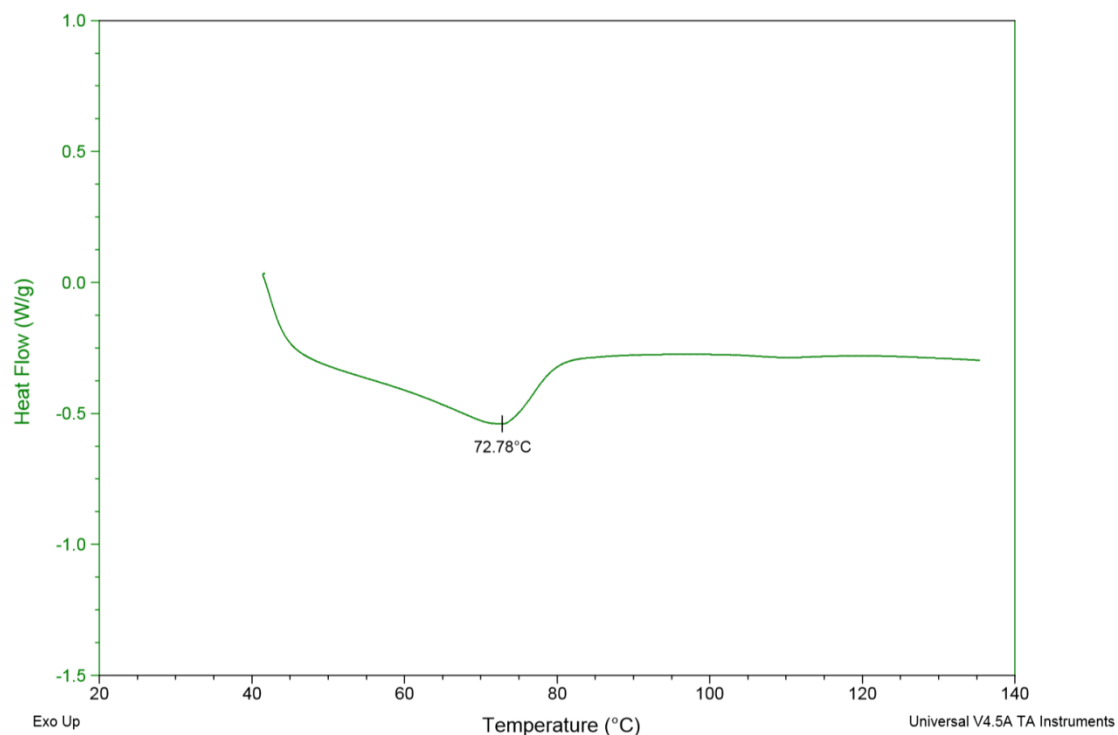

**Figure S65.** DSC data of the polymer from table 1, entry 17.

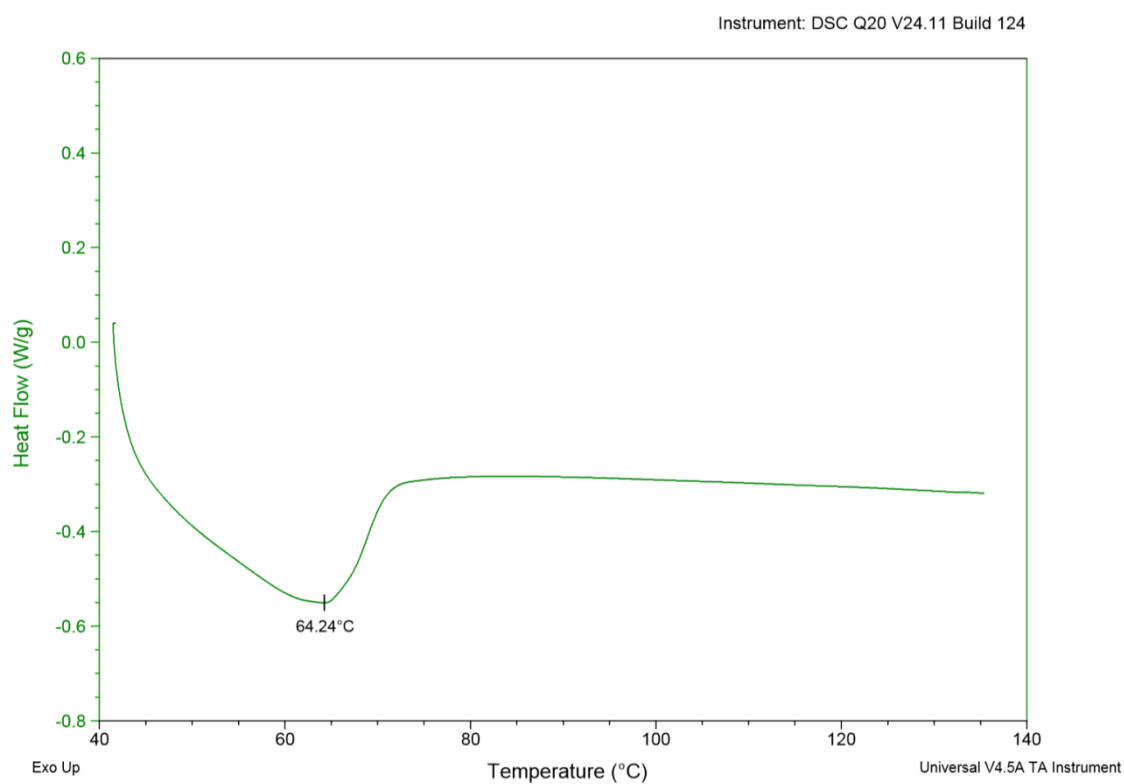

**Figure S66.** DSC data of the polymer from table 1, entry 18.

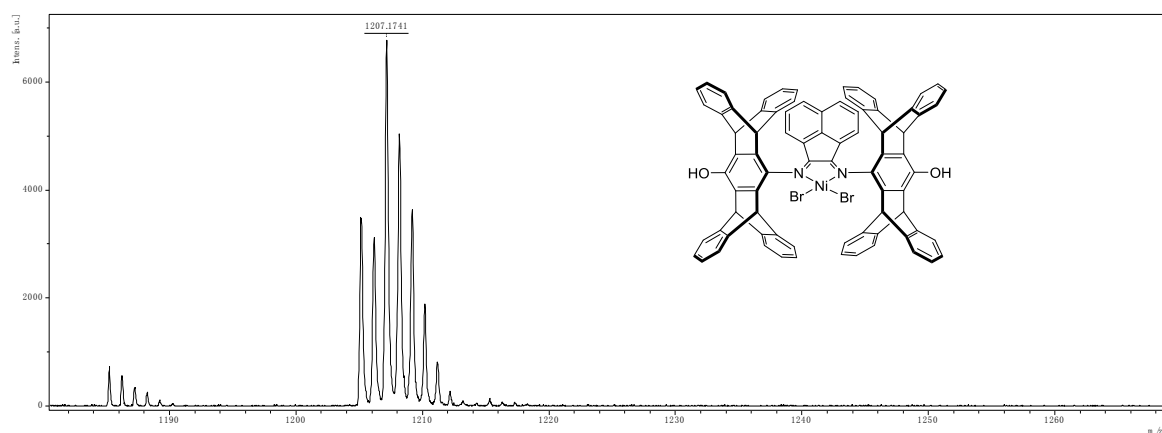

**Figure S67.** MALDI-TOF-MS of complex **Ipty-Ni1**.

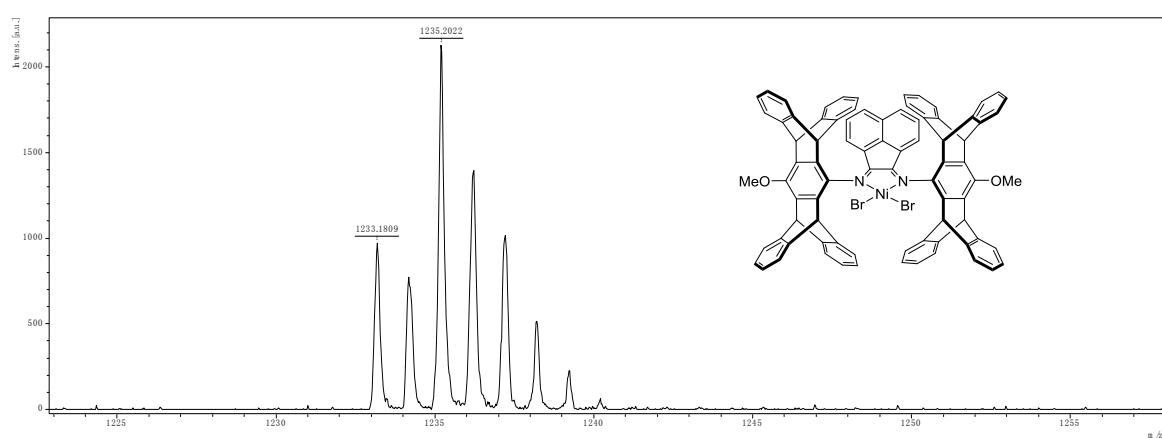

**Figure S68.** MALDI-TOF-MS of complex **Ipty-Ni2**.

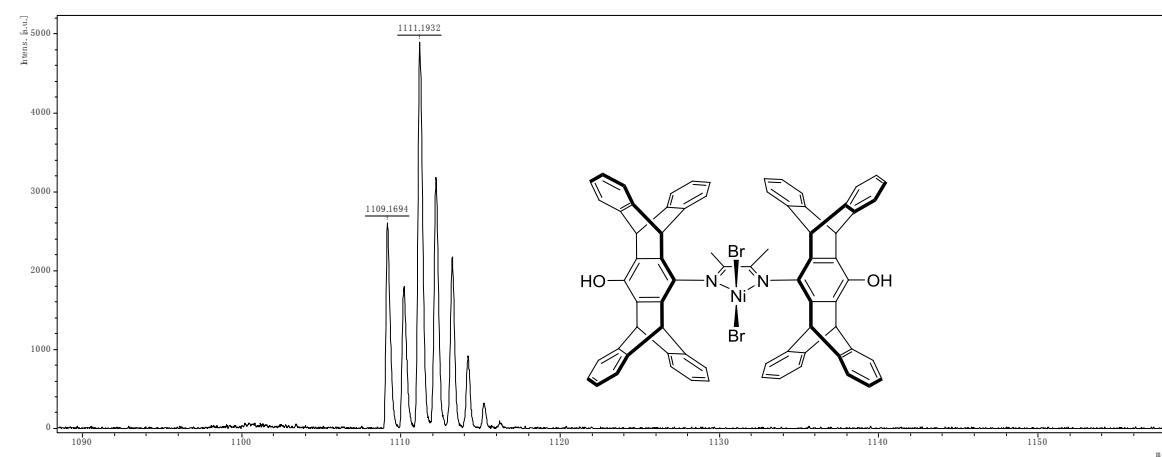

**Figure S69.** MALDI-TOF-MS of complex **Ipty-Ni3**.

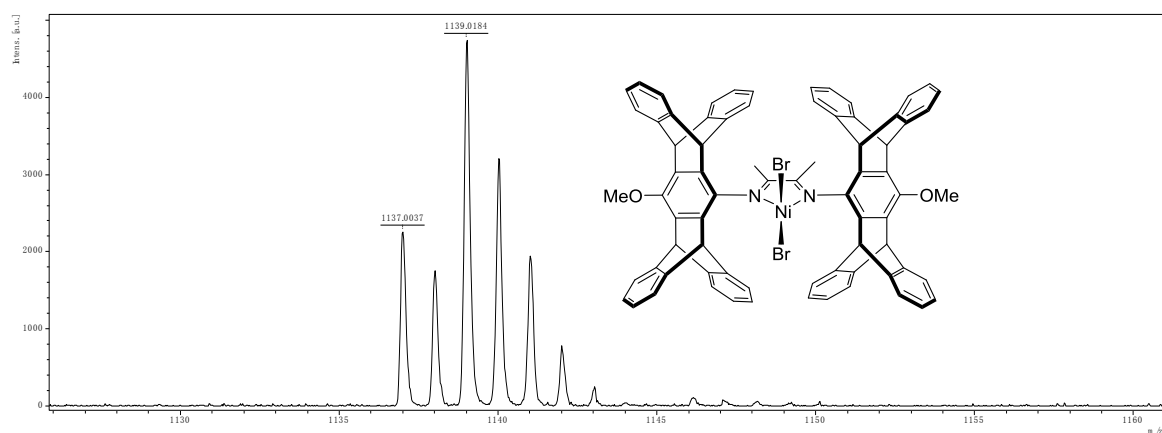

**Figure S70.** MALDI-TOF-MS of complex **Ipty-Ni4**.

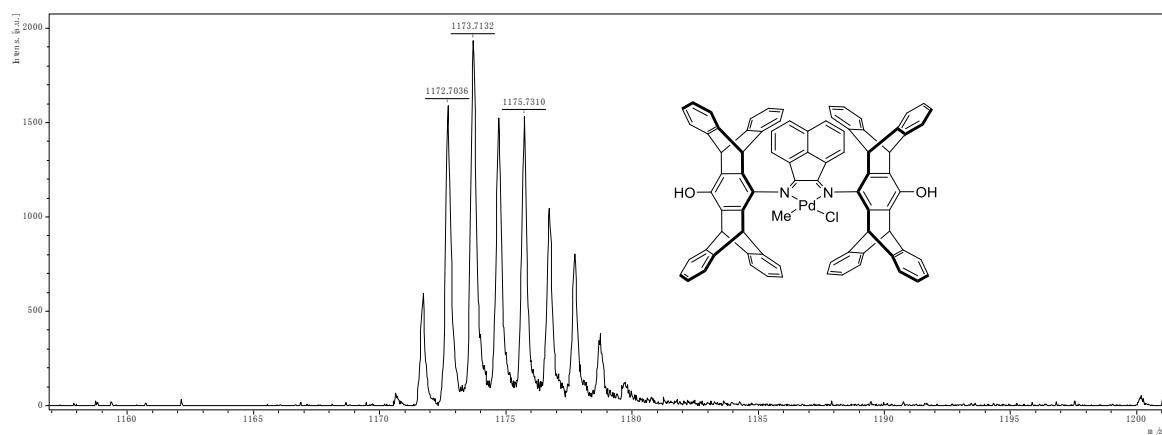

**Figure S71.** MALDI-TOF-MS of complex **Ipty-Pd1**.

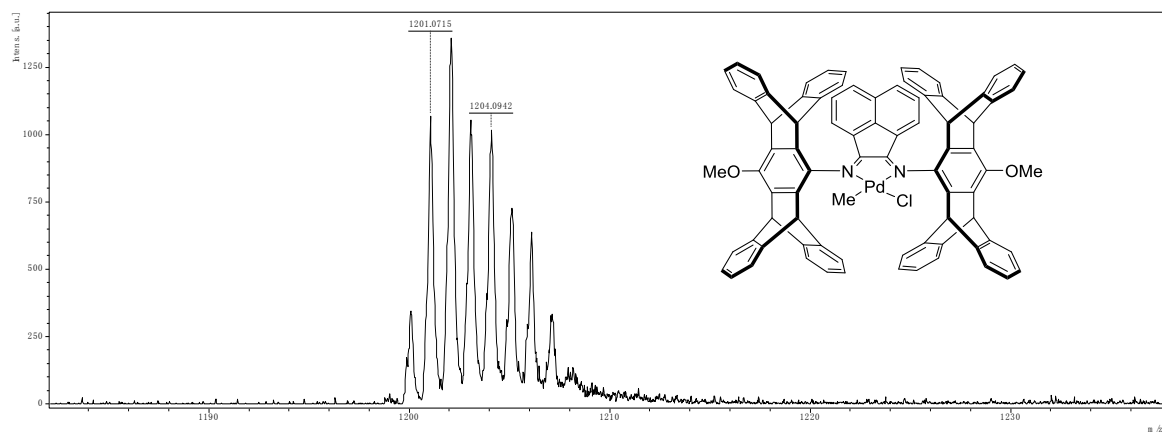

**Figure S72.** MALDI-TOF-MS of complex **Ipty-Pd2**.



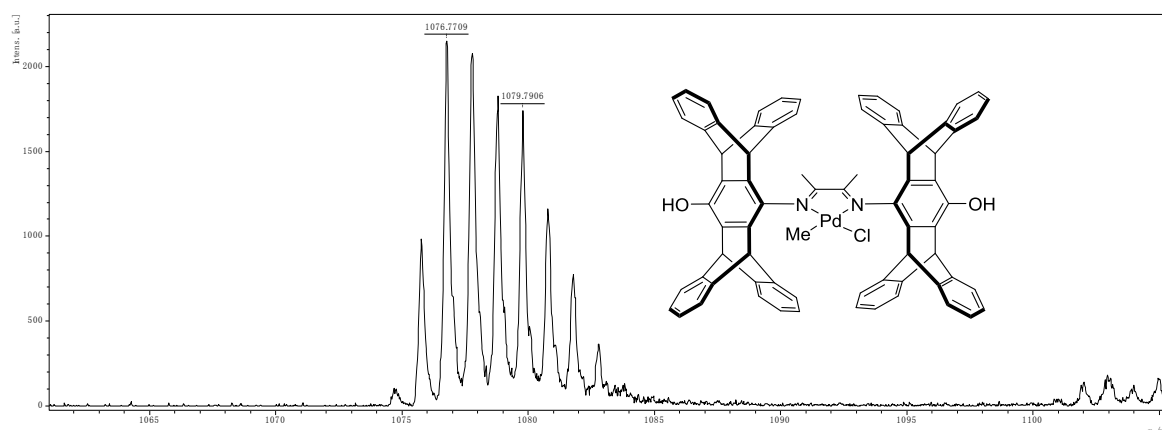

**Figure S73.** MALDI-TOF-MS of complex **Ipty-Pd3**.

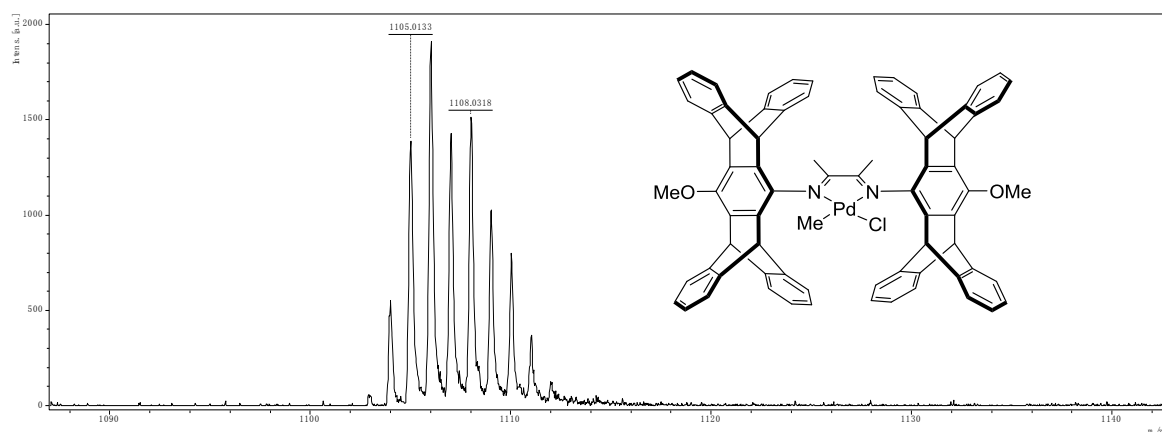

**Figure S74.** MALDI-TOF-MS of complex **Ipty-Pd4**.

## References

- 1, Savka, R.; Foro, S.; Plenio, H. Pentiptycene-based concave NHC–metal complexes. *Dalton Transactions*, **2016**, 45, 11015-11024.
- 2, Guo, L. H.; Zou, C.; Dai, S. Y.; Chen, C. L. Direct synthesis of branched carboxylic acid functionalized poly(1-octene) by  $\alpha$ -diimine palladium catalysts. *Polymers*, **2017**, 9, 122.
- 3, Dai, S. Y.; Sui, X. L.; Chen, C. L. Highly robust palladium(II)  $\alpha$ -diimine catalysts for slow-chain-walking polymerization of ethylene and copolymerization with methyl acrylate. *Angew. Chem. Int. Ed.*, **2015**, 54, 9948-9953.
